# Supplementary material for: Linear Regression QSAR Models for Polo-Like Kinase-1 Inhibitors
Source: PubMed Central journal article supplement (PMC5850101; doi:10.3390/cells7020013), 2018-02-14
Supplement: cells-07-00013-s001.pdf [file cells-07-00013-s001.pdf]

# Linear Regression QSAR Models for Polo Like Kinase-1 Inhibitors

Pablo R. Duchowicz

Instituto de Investigaciones Fisicoquímicas Teóricas y Aplicadas (INIFTA), CONICET, UNLP, Diag. 113 y 64, C.C. 16, Sucursal 4, 1900 La Plata, Argentina.

Corresponding author. Telephone: (+54)(221)4257430 Fax: (+54)(221)4254642. E-mail: [pabloducho@gmail.com](mailto:pabloducho@gmail.com)

## Supporting Information

**Table 1S.** Experimental (exp.) and predicted (pred., Eq. 1)  $\log_{10} IC_{50}$  values for 530 heterogeneous PLK1 inhibitors.

**Table 2S.** List of mathematical equations used in the present study

**Table 3S.** A brief description for molecular descriptors appearing in this QSAR study.

**Table 4S.** Squared correlation matrix for Eq. 1 and the variance inflation factor (*VIF*) for each descriptor.

**Table 5S.** Numerical descriptor values involved in Eq. 1.

**Table 1S.** Experimental (exp.) and predicted (pred., Eq. 1)  $\log_{10} IC_{50}$  values for 530 heterogeneous PLK1 inhibitors.

| ID                | ChEMBL ID [28] | molecular weight<br>(g.mol <sup>-1</sup> ) | canonical smiles                                       | exp.   | pred. Eq.<br>1 |
|-------------------|----------------|--------------------------------------------|--------------------------------------------------------|--------|----------------|
| 1                 | CHEMBL1672002  | 164.2                                      | <chem>CC(C)C1=CC(=O)C(=CC1=O)C</chem>                  | 3.3385 | 3.9298         |
| 2                 | CHEMBL3104854  | 196.16                                     | <chem>Cc1c(O)c(O)c(O)c2C(=O)OCc12</chem>               | 4.0719 | 2.9315         |
| 3                 | CHEMBL1933575  | 203.2                                      | <chem>NC(=O)c1c[nH]c(c1)c2ccnc(N)n2</chem>             | 4.0000 | 4.1394         |
| 4                 | CHEMBL3104853  | 212.2                                      | <chem>COCC1c(C)c(O)c(O)c(O)c1C=O</chem>                | 4.4771 | 3.2496         |
| 5                 | CHEMBL225519   | 213.24                                     | <chem>O=C1NCCc2[nH]c(cc12)c3ccncc3</chem>              | 2.9912 | 3.8937         |
| 6 <sup>a</sup>    | CHEMBL3104852  | 226.18                                     | <chem>COC1OC(=O)c2c(O)c(O)c(O)c(C)c12</chem>           | 4.4771 | 2.8806         |
| 7 <sup>a</sup>    | CHEMBL402272   | 229.24                                     | <chem>Nc1nccc(n1)c2cc3C(=O)NCCc3[nH]2</chem>           | 3.0535 | 3.8530         |
| 8                 | CHEMBL313578   | 237.25                                     | <chem>Oc1ccc(\C=C\2/C(=O)Nc3ccccc23)cc1</chem>         | 4.3979 | 4.3222         |
| 9                 | CHEMBL2407906  | 237.25                                     | <chem>Oc1cccc(\C=C\2/C(=O)Nc3ccccc23)c1</chem>         | 4.3979 | 4.3137         |
| 10 <sup>a</sup>   | CHEMBL2407907  | 237.25                                     | <chem>Oc1cccc1\C=C\2/C(=O)Nc3ccccc23</chem>            | 4.4624 | 4.3007         |
| 11                | CHEMBL262623   | 239.28                                     | <chem>Nc1nnc2NCCC(=Nc12)c3ccccc3</chem>                | 5.0000 | 4.3199         |
| 12 <sup>a</sup>   | CHEMBL590769   | 250.26                                     | <chem>O=C1Cc2cnc3ccnn3c2c4cccc4N1</chem>               | 5.0000 | 4.3524         |
| 13                | CHEMBL591896   | 251.24                                     | <chem>O=C1Cc2cnc3ccnn3c2c4ncccc4N1</chem>              | 5.0000 | 4.3338         |
| 14 <sup>a</sup>   | CHEMBL608427   | 252.23                                     | <chem>O=C1Cc2cnc3nncn3c2c4ncccc4N1</chem>              | 5.0000 | 4.3243         |
| 15 <sup>a</sup>   | CHEMBL263902   | 253.3                                      | <chem>Cc1cccc(c1)C2=Nc3c(N)nnc3NCC2</chem>             | 4.6990 | 4.3234         |
| 16 <sup>a</sup>   | CHEMBL405233   | 253.3                                      | <chem>Cc1ccc(cc1)C2=Nc3c(N)nnc3NCC2</chem>             | 5.0000 | 4.3218         |
| 17 <sup>a</sup>   | CHEMBL3361128  | 254.24                                     | <chem>Oc1ccc(\C=C\2\Oc3ccccc3C2=O)cc1O</chem>          | 5.0000 | 4.2765         |
| 18 <sup>a</sup>   | CHEMBL259380   | 254.29                                     | <chem>Nc1nc(N)c2N=C(CCn2n1)c3ccccc3</chem>             | 5.0000 | 4.2911         |
| 19                | CHEMBL466154   | 258.23                                     | <chem>Cc1cc(O)cc2Oc3cc(O)cc(O)c3C(=O)c12</chem>        | 4.8791 | 4.1810         |
| 20 <sup>* b</sup> | CHEMBL2407910  | 261.28                                     | <chem>O=C1Nc2cccc2/C1=C/c3ccc4[nH]ncc4c3</chem>        | 4.3010 | 4.3391         |
| 21 <sup>a</sup>   | CHEMBL2407911  | 261.28                                     | <chem>O=C1Nc2cccc2/C1=C\c3ccc4cn[nH]c4c3</chem>        | 4.3802 | 4.3380         |
| 22                | CHEMBL2407909  | 262.27                                     | <chem>O=C1Nc2cccc2/C1=C\c3ccc4nn[nH]c4c3</chem>        | 4.4624 | 4.3307         |
| 23                | CHEMBL492008   | 264.22                                     | <chem>NC(=O)c1sc2c(cc2[n+][O-])C#N)[N+](=O)[O-]</chem> | 3.9031 | 3.4373         |
| 24                | CHEMBL1288582  | 264.28                                     | <chem>COc1ccc2cc([nH]c2c1)c3n[nH]c4ccnc34</chem>       | 4.4771 | 4.3655         |
| 25                | CHEMBL1689162  | 273.31                                     | <chem>COc1cc(sc1C(=O)N)n2cnc3ccccc23</chem>            | 3.7251 | 1.4366         |
| 26 <sup>a</sup>   | CHEMBL407532   | 273.72                                     | <chem>Nc1ncnc2NCCC(=Nc12)c3cccc(Cl)c3</chem>           | 5.0000 | 4.3362         |
| 27 <sup>a</sup>   | CHEMBL407265   | 273.72                                     | <chem>Nc1ncnc2NCCC(=Nc12)c3ccc(Cl)cc3</chem>           | 5.0000 | 4.3307         |
| 28                | CHEMBL454440   | 274.23                                     | <chem>Cc1c(O)c(O)cc2Oc3cc(O)cc(O)c3C(=O)c12</chem>     | 3.9445 | 2.9942         |
| 29                | CHEMBL2407912  | 279.27                                     | <chem>Fc1ccc2NC(=O)\C(=C\c3ccc4cn[nH]c4c3)\c2c1</chem> | 4.1761 | 4.2624         |
| 30 <sup>*</sup>   | CHEMBL2407913  | 279.27                                     | <chem>Fc1ccc2NC(=O)\C(=C/c3ccc4cn[nH]c4c3)\c2c1</chem> | 4.1761 | 4.2624         |
| 31                | CHEMBL1270230  | 279.3                                      | <chem>NC(=O)c1cc([nH]c1c2cccc2)c3ccnc(N)n3</chem>      | 4.0000 | 4.1324         |
| 32                | CHEMBL1957190  | 279.33                                     | <chem>CC(C)n1c2CCCC(=O)c2c3C(=O)c4cccc4c13</chem>      | 4.5441 | 3.8912         |

|     |               |        |                                                                |        |        |
|-----|---------------|--------|----------------------------------------------------------------|--------|--------|
| 33  | CHEMBL599248  | 280.28 | <chem>COc1ccc2c(NC(=O)Cc3cnc4ccnn4c23)c1</chem>                | 5.0000 | 4.3318 |
| 34^ | CHEMBL597005  | 281.27 | <chem>COc1ccc2c(NC(=O)Cc3cnc4nncn4c23)c1</chem>                | 5.0000 | 4.3223 |
| 35  | CHEMBL3394760 | 288.34 | <chem>OC(CN1CCCC1)Cn2cc(C(=O)O)c3ccccc23</chem>                | 3.6848 | 3.3405 |
| 36^ | CHEMBL260620  | 288.74 | <chem>Nc1nc(N)c2N=C(CCNc2n1)c3ccc(Cl)cc3</chem>                | 5.0000 | 4.3018 |
| 37  | CHEMBL259381  | 288.74 | <chem>Nc1nc(N)c2N=C(CCNc2n1)c3cccc(Cl)c3</chem>                | 5.0000 | 4.3072 |
| 38  | CHEMBL3394758 | 290.36 | <chem>CCN(CC)CC(O)Cn1cc(C(=O)O)c2ccccc12</chem>                | 3.2810 | 3.3359 |
| 39^ | CHEMBL2407916 | 291.3  | <chem>COc1ccc2NC(=O)\C(=C\c3ccc4cn[nH]c4c3)\c2c1</chem>        | 4.0000 | 4.3173 |
| 40  | CHEMBL597207  | 294.26 | <chem>O=C1Cc2cc3C(=O)NC(=O)Nc3nc2c4ccccc4N1</chem>             | 5.0000 | 4.0819 |
| 41^ | CHEMBL610512  | 295.25 | <chem>O=C1Cc2cc3C(=O)NC(=O)Nc3nc2c4ncccc4N1</chem>             | 5.0000 | 4.0724 |
| 42^ | CHEMBL606119  | 295.25 | <chem>O=C1Cc2cc3C(=O)NC(=O)Nc3nc2c4cnccc4N1</chem>             | 5.0000 | 4.0747 |
| 43  | CHEMBL2407914 | 295.72 | <chem>Clc1ccc2NC(=O)\C(=C\c3ccc4cn[nH]c4c3)\c2c1</chem>        | 4.0000 | 4.3483 |
| 44* | CHEMBL2407915 | 295.72 | <chem>Clc1ccc2\C(=C/c3ccc4cn[nH]c4c3)\C(=O)Nc2c1</chem>        | 4.4150 | 4.3483 |
| 45^ | CHEMBL442957  | 298.36 | <chem>Cc1nc(C)c(s1)c2ccnc(Nc3ccc(O)cc3)n2</chem>               | 3.6990 | 4.3655 |
| 46  | CHEMBL431336  | 299.35 | <chem>Cc1nc(N)sc1c2ccnc(Nc3ccc(O)cc3)n2</chem>                 | 4.3979 | 4.3655 |
| 47^ | CHEMBL2036725 | 301.35 | <chem>Cn1c(nc2ccccc12)c3ccnc(Nc4ccccc4)n3</chem>               | 4.7782 | 4.3655 |
| 48  | CHEMBL6246    | 302.19 | <chem>Oc1cc2C(=O)Oc3c(O)c(O)cc4C(=O)Oc(c1O)c2c34</chem>        | 3.5237 | 2.8122 |
| 49  | CHEMBL50      | 302.24 | <chem>OC1=C(Oc2cc(O)cc(O)c2C1=O)c3ccc(O)c(O)c3</chem>          | 3.7597 | 3.9529 |
| 50  | CHEMBL603255  | 302.33 | <chem>O=C1Cc2cnc(Nc3ccccc3)nc2c4ccccc4N1</chem>                | 5.0000 | 4.3413 |
| 51* | CHEMBL3394764 | 302.37 | <chem>OC(CN1CCCC1)Cn2cc(CC(=O)O)c3ccccc23</chem>               | 2.1139 | 3.3971 |
| 52* | CHEMBL3394759 | 302.37 | <chem>OC(CN1CCCC1)Cn2cc(C(=O)O)c3ccccc23</chem>                | 3.3222 | 3.3412 |
| 53^ | CHEMBL3394762 | 304.38 | <chem>CCN(CC)CC(O)Cn1cc(CC(=O)O)c2ccccc12</chem>               | 3.4216 | 3.3933 |
| 54^ | CHEMBL1088633 | 306.19 | <chem>COc1cc2CCN=C(c3ccc(Cl)c3)c2cc1Cl</chem>                  | 4.0000 | 4.4098 |
| 55  | CHEMBL1094401 | 306.32 | <chem>NC(=O)c1n[nH]c2c1CCc3cnc(Nc4ccccc4)nc23</chem>           | 2.3945 | 3.0427 |
| 56  | CHEMBL476124  | 307.21 | <chem>NC(=O)c1sc2c(cc2[n+][1][O-])C(F)(F)F)[N+](=O)[O-]</chem> | 2.6990 | 3.3427 |
| 57  | CHEMBL3260250 | 311.33 | <chem>CC(C)C1=CC(=O)C(=CC1=O)\C=N\OC(=O)c2ccccc2C</chem>       | 3.3636 | 3.6073 |
| 58* | CHEMBL47590   | 313.38 | <chem>CNc1nc(C)c(s1)c2ccnc(Nc3ccc(O)cc3)n2</chem>              | 4.0000 | 4.3655 |
| 59  | CHEMBL452932  | 315.37 | <chem>C[C@H](Nc1cc2c(noc2cn1)c3ccccc3)c4ccccc4</chem>          | 3.2084 | 3.2607 |
| 60^ | CHEMBL2036726 | 315.37 | <chem>Cc1ccc(Nc2nccc(n2)c3nc4ccccc4n3C)cc1</chem>              | 5.0000 | 4.3655 |
| 61^ | CHEMBL605324  | 316.36 | <chem>Cc1ccc(Nc2ncc3CC(=O)Nc4ccccc4c3n2)cc1</chem>             | 5.0000 | 4.3415 |
| 62  | CHEMBL3394763 | 316.39 | <chem>OC(CN1CCCC1)Cn2cc(CC(=O)O)c3ccccc23</chem>               | 2.6128 | 3.3977 |
| 63  | CHEMBL3394768 | 316.39 | <chem>OC(CN1CCCC1)Cn2cc(CCC(=O)O)c3ccccc23</chem>              | 3.4624 | 3.4283 |
| 64* | CHEMBL2036870 | 317.34 | <chem>Cn1c(nc2ccccc12)c3ccnc(Nc4cccc(O)c4)n3</chem>            | 3.5682 | 4.3655 |
| 65  | CHEMBL2036869 | 317.34 | <chem>Cn1c(nc2ccccc12)c3ccnc(Nc4ccc(O)cc4)n3</chem>            | 4.0792 | 4.3655 |
| 66  | CHEMBL3394761 | 317.38 | <chem>CN1CCN(CC(O)Cn2cc(C(=O)O)c3ccccc23)CC1</chem>            | 3.5403 | 3.3263 |
| 67  | CHEMBL2407918 | 318.33 | <chem>CC(=O)Nc1ccc2NC(=O)\C(=C\c3ccc4cn[nH]c4c3)\c2c1</chem>   | 4.0000 | 4.2922 |
| 68^ | CHEMBL2407919 | 318.33 | <chem>CC(=O)Nc1ccc2\C(=C/c3ccc4cn[nH]c4c3)\C(=O)Nc2c1</chem>   | 4.0000 | 4.2922 |
| 69^ | CHEMBL603545  | 318.33 | <chem>Oc1ccccc1Nc2ncc3CC(=O)Nc4ccccc4c3n2</chem>               | 4.1461 | 2.8846 |

|      |               |        |                                                    |        |        |
|------|---------------|--------|----------------------------------------------------|--------|--------|
| 70   | CHEMBL604545  | 318.33 | Oc1cccc(Nc2ncc3CC(=O)Nc4ccccc4c3n2)c1              | 4.2788 | 4.3262 |
| 71   | CHEMBL2407917 | 318.33 | CNC(=O)c1ccc2NC(=O)\C(=C\c3ccc4cn[nH]c4c3)\c2c1    | 4.6902 | 4.2796 |
| 72^  | CHEMBL605841  | 318.33 | Oc1ccc(Nc2ncc3CC(=O)Nc4ccccc4c3n2)cc1              | 5.0000 | 4.3285 |
| 73   | CHEMBL3394766 | 318.37 | OC(CN1CCOCC1)Cn2cc(CC(=O)O)c3ccccc23               | 2.9823 | 3.3675 |
| 74^  | CHEMBL602043  | 319.32 | Oc1cccc(Nc2ncc3CC(=O)Nc4ccncc4c3n2)c1              | 3.3617 | 4.3132 |
| 75   | CHEMBL597597  | 319.32 | Oc1ccc(Nc2ncc3CC(=O)Nc4ccncc4c3n2)cc1              | 3.4150 | 4.3156 |
| 76   | CHEMBL598633  | 319.32 | Oc1ccc(Nc2ncc3CC(=O)Nc4ccncc4c3n2)cc1              | 4.7404 | 4.3100 |
| 77   | CHEMBL606185  | 319.32 | Oc1cccc(Nc2ncc3CC(=O)Nc4ccncc4c3n2)c1              | 5.0000 | 4.3076 |
| 78   | CHEMBL559845  | 320.35 | Cn1nc(C(=O)N)c2CCc3cnc(Nc4ccccc4)nc3c12            | 1.8325 | 3.0510 |
| 79^  | CHEMBL1802870 | 320.35 | CCc1nc(C)c(\C=C\2/C(=O)Nc3ccc(NC(=O)C#C)cc23)[nH]1 | 4.3010 | 3.6696 |
| 80*  | CHEMBL1098060 | 321.33 | Cn1nc(C(=O)O)c2CCc3cnc(Nc4ccccc4)nc3c12            | 2.0414 | 2.8015 |
| 81   | CHEMBL2036871 | 321.33 | CN1C(=O)N(C)c2nc(ccc2C1=O)c3nc4ccccc4n3C           | 5.0000 | 4.1792 |
| 82*  | CHEMBL490992  | 321.4  | C[C@H](Nc1cc2c(noc2cn1)c3cccs3)c4ccccc4            | 3.4781 | 3.2682 |
| 83   | CHEMBL603481  | 322.32 | CN1C(=O)N(C)c2nc3c(CC(=O)Nc4ccccc4)cc2C1=O         | 5.0000 | 4.1637 |
| 84   | CHEMBL599055  | 323.31 | CN1C(=O)N(C)c2nc3c(CC(=O)Nc4ccccc4)cc2C1=O         | 5.0000 | 4.1564 |
| 85   | CHEMBL599056  | 323.31 | CN1C(=O)N(C)c2nc3c(CC(=O)Nc4ccccc4)cc2C1=O         | 5.0000 | 4.1542 |
| 86^  | CHEMBL599666  | 324.29 | COc1ccc2c(NC(=O)Cc3cc4C(=O)NC(=O)Nc4nc23)c1        | 5.0000 | 4.0740 |
| 87   | CHEMBL3260249 | 324.33 | O=C(NNC(=O)c1ccc2OCCOc2c1)\C=C\c3ccccc3            | 1.9542 | 2.4275 |
| 88   | CHEMBL599247  | 326.35 | O=C1Cc2cnc3cc(nn3c2c4ccccc4N1)c5ccccc5             | 5.0000 | 4.3474 |
| 89   | CHEMBL296586  | 327.18 | BrC1ccc2[nH]c3c(CC(=O)Nc4ccccc4)c2c1               | 5.0000 | 4.3932 |
| 90^  | CHEMBL598435  | 327.34 | O=C1Cc2cnc3cc(nn3c2c4ncccc4N1)c5ccccc5             | 5.0000 | 4.3288 |
| 91^  | CHEMBL598434  | 327.34 | O=C1Cc2cnc3cc(nn3c2c4ncccc4N1)c5ccccc5             | 5.0000 | 4.3345 |
| 92   | CHEMBL525907  | 328.41 | C[C@H](Nc1cc2c(cn1)c(C)nn2c3ccccc3)c4ccccc4        | 3.1143 | 3.8049 |
| 93   | CHEMBL489992  | 329.4  | C[C@H](Nc1cc2c(noc2cn1)c3ccccc3)c4ccccc4           | 2.7396 | 3.2607 |
| 94*  | CHEMBL521761  | 329.4  | C[C@H](Nc1cc2c(noc2cn1)c3ccc(C)cc3)c4ccccc4        | 3.0682 | 3.2607 |
| 95   | CHEMBL491022  | 329.4  | C[C@H](Nc1cc2c(Cc3ccccc3)noc2cn1)c4ccccc4          | 4.3010 | 3.2645 |
| 96^  | CHEMBL3394767 | 330.42 | OC(CN1CCCCC1)Cn2cc(CCC(=O)O)c3ccccc23              | 3.7566 | 3.4287 |
| 97*  | CHEMBL2036868 | 331.37 | COc1ccc(Nc2nccc(n2)c3nc4ccccc4n3C)cc1              | 4.1761 | 4.3655 |
| 98*  | CHEMBL3394765 | 331.41 | CN1CCN(CC(O)Cn2cc(CC(=O)O)c3ccccc23)CC1            | 3.2742 | 3.3833 |
| 99^  | CHEMBL2407908 | 332.15 | Oc1ccc(\C=C\2/C(=O)Nc3ccc(Br)cc23)cc1O             | 4.0000 | 4.2994 |
| 100* | CHEMBL598201  | 332.36 | Cc1cc(O)ccc1Nc2ncc3CC(=O)Nc4ccccc4c3n2             | 4.3010 | 4.3289 |
| 101* | CHEMBL598025  | 332.36 | COc1ccc(Nc2ncc3CC(=O)Nc4ccccc4c3n2)cc1             | 4.6721 | 4.3357 |
| 102  | CHEMBL1277019 | 332.42 | CCc1ccsc1c2cnc(N)c(n2)N3CCC(CC3)C(=O)O             | 3.9294 | 3.5029 |
| 103* | CHEMBL596988  | 333.34 | COc1ccc(Nc2ncc3CC(=O)Nc4ccncc4c3n2)cc1             | 3.3979 | 4.3228 |
| 104  | CHEMBL606255  | 333.34 | COc1ccc(Nc2ncc3CC(=O)Nc4ccncc4c3n2)cc1             | 5.0000 | 4.3171 |
| 105  | CHEMBL3309995 | 334.33 | Nc1ccc2c(c1)nc(Cc3ccc4OCOc4c3)n5nc(N)nc25          | 4.0000 | 4.3655 |
| 106* | CHEMBL1094477 | 334.38 | Cc1ccccc1Nc2ncc3CCc4c(nn(C)c4c3n2)C(=O)N           | 1.1761 | 3.0513 |

|      |               |        |                                                    |        |        |
|------|---------------|--------|----------------------------------------------------|--------|--------|
| 107  | CHEMBL562104  | 334.38 | CNC(=O)c1nn(C)c2c1CCc3cnc(Nc4cccc4)nc23            | 3.6248 | 3.2081 |
| 108* | CHEMBL1097022 | 335.36 | Cn1nc(C(=O)N)c2CCc3cnc(Nc4cccc4N)nc3c12            | 2.1761 | 3.0393 |
| 109^ | CHEMBL523634  | 335.42 | C[C@H](Nc1cc2c(noc2cn1)c3csc3C)c4cccc4             | 2.8915 | 3.2671 |
| 110* | CHEMBL491193  | 335.44 | C[C@H](Nc1cc2c(noc2cn1)C3CCCC3C)c4cccc4            | 3.7550 | 3.2791 |
| 111^ | CHEMBL2036727 | 335.79 | Cn1c(nc2cccc12)c3cnc(Nc4ccc(Cl)cc4)n3              | 5.0000 | 4.3655 |
| 112* | CHEMBL599844  | 336.78 | Clc1cccc1Nc2ncc3CC(=O)Nc4cccc4c3n2                 | 4.8633 | 4.3447 |
| 113  | CHEMBL596807  | 336.78 | Clc1ccc(Nc2ncc3CC(=O)Nc4cccc4c3n2)cc1              | 5.0000 | 4.3436 |
| 114^ | CHEMBL3309990 | 337.31 | Nc1nc2c3c(F)cccc3nc(Cc4ccc5OCOc5c4)n2n1            | 4.0000 | 4.3655 |
| 115* | CHEMBL1095771 | 338.34 | Cn1nc(C(=O)N)c2CCc3cnc(Nc4cccc4F)nc3c12            | 2.0969 | 3.0154 |
| 116* | CHEMBL3260246 | 338.36 | Cc1ccc(\C=C\C(=O)NNC(=O)c2ccc3OCCOc3c2)cc1         | 3.0212 | 2.4277 |
| 117  | CHEMBL1222044 | 339.27 | NC(=O)c1sc2c(cc(SC(F)(F)F)cc2[n+][O-])[N+](=O)[O-] | 1.3010 | 3.3804 |
| 118  | CHEMBL1087421 | 340.63 | COc1cc2CCN=C(c3ccc(Cl)c(Cl)c3)c2cc1Cl              | 4.0000 | 4.4205 |
| 119  | CHEMBL3260243 | 342.32 | Fc1ccc(\C=C\C(=O)NNC(=O)c2ccc3OCCOc3c2)cc1         | 2.7709 | 2.3845 |
| 120  | CHEMBL1956071 | 342.36 | CCn1c(nc2nccc(C(=O)N)3CC[C@H](N)C3)c12)c4nonc4N    | 4.0000 | 3.7377 |
| 121  | CHEMBL489993  | 343.42 | C[C@H](Nc1cc2c(noc2cn1)c3cc(C)cc(C)c3)c4cccc4      | 2.5185 | 3.2607 |
| 122  | CHEMBL2036867 | 345.4  | CCOc1ccc(Nc2nccc(n2)c3nc4cccc4n3C)cc1              | 5.0000 | 3.8589 |
| 123  | CHEMBL3298400 | 345.46 | CC(C)(C)CNC(=O)CC1CNC(=O)c2cc(cn12)c3ccsc3         | 4.0000 | 4.0868 |
| 124^ | CHEMBL606410  | 346.38 | CCOc1ccc(Nc2ncc3CC(=O)Nc4cccc4c3n2)cc1             | 5.0000 | 3.8278 |
| 125^ | CHEMBL596808  | 347.33 | [O-][N+](=O)c1ccc(Nc2ncc3CC(=O)Nc4cccc4c3n2)cc1    | 5.0000 | 4.3121 |
| 126  | CHEMBL2036866 | 347.37 | COc1ccc(Nc2nccc(n2)c3nc4cccc4n3C)cc1O              | 3.0792 | 4.3655 |
| 127  | CHEMBL605118  | 347.37 | CCOc1ccc(Nc2ncc3CC(=O)Nc4cncnc4c3n2)cc1            | 3.2304 | 3.8124 |
| 128^ | CHEMBL598837  | 347.37 | CCOc1ccc(Nc2ncc3CC(=O)Nc4cccnc4c3n2)cc1            | 5.0000 | 3.8063 |
| 129  | CHEMBL598418  | 348.36 | COc1ccc2c(NC(=O)Cc3cnc(Nc4ccc(O)cc4)nc23)c1        | 2.8751 | 4.3079 |
| 130* | CHEMBL604912  | 348.36 | COc1ccc2c(NC(=O)Cc3cnc(Nc4cccc(O)c4)nc23)c1        | 2.9243 | 4.3055 |
| 131  | CHEMBL603463  | 348.36 | COc1ccc(Nc2ncc3CC(=O)Nc4cccc4c3n2)cc1O             | 3.7559 | 4.3206 |
| 132  | CHEMBL1094735 | 348.4  | CC(C)n1nc(C(=O)N)c2CCc3cnc(Nc4cccc4)nc3c12         | 2.6335 | 3.0522 |
| 133* | CHEMBL1095457 | 349.39 | CNc1cccc1Nc2ncc3CCc4c(nn(C)c4c3n2)C(=O)N           | 2.0414 | 3.0440 |
| 134* | CHEMBL1098059 | 349.39 | CCOC(=O)c1nn(C)c2c1CCc3cnc(Nc4cccc4)nc23           | 4.0000 | 3.0684 |
| 135^ | CHEMBL523286  | 349.81 | C[C@H](Nc1cc2c(noc2cn1)c3cccc(Cl)c3)c4cccc4        | 2.7959 | 3.2609 |
| 136* | CHEMBL1094135 | 350.37 | COc1cccc1Nc2ncc3CCc4c(nn(C)c4c3n2)C(=O)N           | 1.6232 | 1.5975 |
| 137^ | CHEMBL1095448 | 350.37 | COc1cccc(Nc2ncc3CCc4c(nn(C)c4c3n2)C(=O)N)c1        | 2.1303 | 3.0384 |
| 138^ | CHEMBL1094322 | 350.37 | COc1ccc(Nc2ncc3CCc4c(nn(C)c4c3n2)C(=O)N)cc1        | 2.4082 | 3.0403 |
| 139* | CHEMBL2036865 | 351.79 | Cn1c(nc2cccc12)c3cnc(Nc4ccc(O)c(Cl)c4)n3           | 3.7782 | 4.3655 |
| 140  | CHEMBL596598  | 352.34 | COc1ccc2c(NC(=O)Cc3cc4C(=O)N(C)C(=O)N(C)c4nc23)c1  | 5.0000 | 4.1558 |
| 141* | CHEMBL598000  | 352.77 | Oc1ccc(Nc2ncc3CC(=O)Nc4cccc4c3n2)cc1Cl             | 3.9685 | 4.3313 |
| 142  | CHEMBL599446  | 353.76 | Oc1ccc(Nc2ncc3CC(=O)Nc4cncnc4c3n2)cc1Cl            | 3.1461 | 4.3184 |
| 143^ | CHEMBL598431  | 353.76 | Oc1ccc(Nc2ncc3CC(=O)Nc4cccnc4c3n2)cc1Cl            | 5.0000 | 4.3127 |

|      |               |        |                                                                 |        |        |
|------|---------------|--------|-----------------------------------------------------------------|--------|--------|
| 144  | CHEMBL3260241 | 354.36 | COc1cccc(\ C=C\ C(=O)NNC(=O)c2ccc3OCCOc3c2)c1                   | 1.4771 | 2.4130 |
| 145^ | CHEMBL3260247 | 354.36 | COc1ccc(\ C=C\ C(=O)NNC(=O)c2ccc3OCCOc3c2)cc1                   | 2.2788 | 2.4169 |
| 146^ | CHEMBL603259  | 356.38 | COc1ccc2c(NC(=O)Cc3enc4ccc(nn4c23)c5ccccc5)c1                   | 4.2304 | 4.3267 |
| 147^ | CHEMBL3104855 | 358.3  | Cc1c(O)c(O)c2oc(cc2c1C=O)c3c(C)c(O)c(O)c(O)c3C=O                | 3.8000 | 3.2496 |
| 148* | CHEMBL3260244 | 358.78 | Clc1ccc(\ C=C\ C(=O)NNC(=O)c2ccc3OCCOc3c2)cc1                   | 3.1903 | 2.4303 |
| 149* | CHEMBL522618  | 359.38 | C[C@H](Nc1cc2c(noc2cn1)c3ccc4OCOc4c3)c5ccccc5                   | 2.3304 | 3.2452 |
| 150^ | CHEMBL559639  | 360.41 | Cn1nc(C(=O)NC2CC2)c3CCc4cnc(Nc5ccccc5)nc4c13                    | 4.0000 | 3.2522 |
| 151  | CHEMBL1230607 | 361.48 | CC(C)CC(=O)Nc1n[nH]c2c1CN(C(=O)C3CCN(C)CC3)C2(C)C               | 4.0000 | 4.7381 |
| 152^ | CHEMBL606395  | 362.38 | COc1ccc(Nc2ncc3CC(=O)Nc4cc(OC)ccc4c3n2)cc1                      | 2.5441 | 4.3151 |
| 153  | CHEMBL1099105 | 362.39 | CC(=O)c1cccc(Nc2ncc3CCc4c(nn(C)c4c3n2)C(=O)N)c1                 | 2.0000 | 3.0275 |
| 154* | CHEMBL1099106 | 362.39 | CC(=O)c1ccc(Nc2ncc3CCc4c(nn(C)c4c3n2)C(=O)N)cc1                 | 2.2945 | 3.0308 |
| 155* | CHEMBL1099104 | 362.39 | CC(=O)c1cccc1Nc2ncc3CCc4c(nn(C)c4c3n2)C(=O)N                    | 2.5391 | 3.0233 |
| 156  | CHEMBL1095772 | 362.43 | CC(C)c1cccc1Nc2ncc3CCc4c(nn(C)c4c3n2)C(=O)N                     | 2.5623 | 3.0517 |
| 157* | CHEMBL478028  | 362.86 | C[C@H](Nc1cc2c(cn1)c(C)nn2c3cccc(Cl)c3)c4ccccc4                 | 2.0828 | 3.8051 |
| 158  | CHEMBL1945559 | 363.24 | Cn1c2C(=O)NC3(CCNCC3)C(C#N)c2c4ccc(Cl)c(Cl)c14                  | 4.0000 | 4.0312 |
| 159  | CHEMBL1094815 | 363.37 | Cn1nc(C(=O)N)c2CCc3cnc(Nc4ccccc4C(=O)N)nc3c12                   | 3.3172 | 3.0133 |
| 160  | CHEMBL3309997 | 363.37 | OCCCNc1ccc2c(c1)nc(c3ccc4OCOc4c3)n5ncnc25                       | 4.0000 | 3.8705 |
| 161* | CHEMBL2407896 | 363.41 | O=C1Nc2ccccc2/C1=C\ c3ccc4c(\ C=C\ c5ccccc5)n[nH]c4c3           | 4.0000 | 4.3321 |
| 162^ | CHEMBL2407746 | 364.4  | O=C1Nc2ccccc2/C1=C\ c3ccc4c(\ C=C\ c5ccccc5)n[nH]c4c3           | 4.0000 | 4.3294 |
| 163* | CHEMBL2407745 | 364.4  | O=C1Nc2ccccc2/C1=C\ c3ccc4c(\ C=C\ c5ccccc5)n[nH]c4c3           | 4.0000 | 4.3289 |
| 164  | CHEMBL2407749 | 364.4  | O=C1Nc2ccccc2/C1=C\ c3ccc4c(\ C=C\ c5ccccc5)n[nH]c4c3           | 4.0000 | 4.3298 |
| 165* | CHEMBL1094810 | 365.35 | Cn1nc(C(=O)N)c2CCc3cnc(Nc4ccccc4[N+](=O)[O-])nc3c12             | 2.6884 | 2.9949 |
| 166^ | CHEMBL1095132 | 365.35 | Cn1nc(C(=O)N)c2CCc3cnc(Nc4ccc(cc4)[N+](=O)[O-])nc3c12           | 4.0000 | 3.0103 |
| 167  | CHEMBL1094811 | 365.35 | Cn1nc(C(=O)N)c2CCc3cnc(Nc4cccc(c4)[N+](=O)[O-])nc3c12           | 4.0000 | 3.0035 |
| 168  | CHEMBL3741589 | 366.24 | OC(=O)C1CN(Cc2ccc(OCc3ccc(Cl)c(Cl)c3)cc2)C1                     | 4.0000 | 3.5104 |
| 169  | CHEMBL261849  | 366.41 | COc1ccc(COc2ccc(Cc3cnc(N)nc3N)cc2OC)cc1                         | 4.3802 | 4.3655 |
| 170* | CHEMBL1094478 | 366.44 | CSc1cccc1Nc2ncc3CCc4c(nn(C)c4c3n2)C(=O)N                        | 1.9868 | 3.0566 |
| 171  | CHEMBL3344193 | 368.86 | COc1cc(CNCc2ccccc2)ccc1OCc3ccc(Cl)cc3                           | 0.4771 | 4.3655 |
| 172  | CHEMBL3260248 | 369.33 | [O-][N+](=O)c1ccc(\ C=C\ C(=O)NNC(=O)c2ccc3OCCOc3c2)cc1         | 2.0792 | 2.3628 |
| 173  | CHEMBL3260236 | 369.33 | [O-][N+](=O)c1cccc1\ C=C\ C(=O)NNC(=O)c2ccc3OCCOc3c2            | 2.2788 | 2.3214 |
| 174^ | CHEMBL3260242 | 369.33 | [O-][N+](=O)c1cccc(\ C=C\ C(=O)NNC(=O)c2ccc3OCCOc3c2)c1         | 3.1903 | 2.3458 |
| 175  | CHEMBL599224  | 369.42 | CC(=O)N1CCC(CC1)Nc2ncc3CCc4c(nn(C)c4c3n2)C(=O)N                 | 4.0000 | 3.0513 |
| 176^ | CHEMBL3109404 | 372.5  | COC(=O)c1cc(O)c(O)c(C[C@]2(C)[C@H](C)CC[C@]3(C)[C@H]2CCC=C3C)c1 | 4.3365 | 3.4230 |
| 177  | CHEMBL3104851 | 374.3  | Cc1c(O)c(O)c2O[C@H]3O[C@H](C(=O)c4c(O)c(O)c(O)c(C)c34)c2c1C=O   | 3.5024 | 2.8791 |
| 178  | CHEMBL491621  | 375.42 | COc1ccc(cc1OC)c2noc3cnc(N[C@@H](C)c4ccccc4)cc23                 | 3.6926 | 3.2452 |
| 179  | CHEMBL604712  | 376.4  | CC(C)(C)C(=O)N1Cc2c(NC(=O)c3cc(F)cc(F)c3)n[nH]c2C1(C)C          | 4.0000 | 4.4876 |
| 180* | CHEMBL597191  | 376.41 | CCOc1ccc(Nc2ncc3CC(=O)Nc4cc(OC)ccc4c3n2)cc1                     | 3.8633 | 3.8034 |

|      |               |        |                                                               |        |        |
|------|---------------|--------|---------------------------------------------------------------|--------|--------|
| 181* | CHEMBL2401965 | 376.45 | CC[C@H]1N(C(C)C)c2nc(ncc2N(C)C1=O)n3ccnc3c4cccc4              | 2.9395 | 3.7446 |
| 182^ | CHEMBL3358966 | 377.39 | COc1cc(cc(OC)c1OC)C2=NC(=CNC2=O)c3c[nH]c4cccc34               | 5.0000 | 4.2226 |
| 183* | CHEMBL1097373 | 377.4  | CC(=O)Nc1cccc1Nc2ncc3CCc4c(nn(C)c4c3n2)C(=O)N                 | 3.4019 | 3.0203 |
| 184* | CHEMBL597393  | 378.38 | COc1ccc2c(NC(=O)C)c3cnc(Nc4ccc(OC)c(O)c4)nc23)c1              | 2.1461 | 4.3000 |
| 185* | CHEMBL1094484 | 378.38 | COC(=O)c1cccc1Nc2ncc3CCc4c(nn(C)c4c3n2)C(=O)N                 | 3.0481 | 3.0105 |
| 186  | CHEMBL3309998 | 378.38 | Nc1nc2c3ccc(NCCO)cc3nc(Cc4ccc5OCOC5c4)n2n1                    | 4.0000 | 3.8236 |
| 187  | CHEMBL2407893 | 378.43 | Cc1ccc2NC(=O)\C(=C\c3ccc4c(\C=C\c5ccncc5)n[nH]c4c3)\c2c1      | 4.0000 | 4.3317 |
| 188^ | CHEMBL3353340 | 378.43 | O=C1Nc2cccc2[C@]13C[C@H]3e4ccc5c(\C=C\c6ccncc6)n[nH]c5c4      | 5.0000 | 4.7395 |
| 189  | CHEMBL3814269 | 380.22 | COc1ccc(Br)cc1\C=C\2/SC3=NC(=O)C(=NN3C2=O)C                   | 3.5051 | 4.2110 |
| 190* | CHEMBL2407895 | 380.4  | Oc1ccc2NC(=O)\C(=C\c3ccc4c(\C=C\c5ccncc5)n[nH]c4c3)\c2c1      | 4.0000 | 4.2800 |
| 191  | CHEMBL2407903 | 380.62 | COc1cc(\C=C\2/C(=O)Nc3ccc(Br)cc23)cc(Cl)c1O                   | 3.5563 | 4.3280 |
| 192  | CHEMBL597586  | 381.23 | BrC1ccc(Nc2ncc3CC(=O)Nc4cccc4c3n2)cc1                         | 5.0000 | 4.3445 |
| 193^ | CHEMBL599027  | 381.23 | BrC1cccc1Nc2ncc3CC(=O)Nc4cccc4c3n2                            | 5.0000 | 4.3460 |
| 194^ | CHEMBL1094400 | 382.42 | NC(=O)c1nn(c2cccc2)c3c1CCc4cnc(Nc5cccc5)nc34                  | 4.0000 | 3.0074 |
| 195* | CHEMBL597596  | 382.8  | COc1ccc2c(NC(=O)C)c3cnc(Nc4ccc(O)c(Cl)c4)nc23)c1              | 2.5563 | 4.3107 |
| 196^ | CHEMBL2401964 | 383.47 | CC[C@H]1N(C(C)C)c2nc(ncc2N(C)C1=O)c3cn[nH]c3c4nccs4           | 2.8865 | 3.7508 |
| 197  | CHEMBL3109402 | 383.52 | COc1cc2nc(C)oc2c(C[C@]3(C)[C@H](C)CC[C@]4(C)[C@H]3CCC=C4C)c1O | 5.0000 | 3.8106 |
| 198  | CHEMBL3814827 | 386.41 | FC(F)(F)c1ccc(OC(CCNc2cccn2)c3cccc3)cc1                       | 1.6990 | 3.6534 |
| 199^ | CHEMBL2036728 | 386.45 | Cn1c(nc2cccc12)c3cnc(Nc4ccc(cc4)N5CCOCC5)n3                   | 5.0000 | 3.8472 |
| 200  | CHEMBL1689161 | 386.47 | COc1cc(sc1C(=O)N)n2cnc3ccc(OC4CCN(C)CC4)cc23                  | 3.1239 | 0.8838 |
| 201  | CHEMBL1289926 | 386.47 | CNC(=O)c1cccc1Sc2ccc3c(\C=C\c4cccn4)n[nH]c3c2                 | 4.0000 | 4.3581 |
| 202  | CHEMBL1095709 | 388.35 | NC(=O)c1nn(CC(F)(F)F)c2c1CCc3cnc(Nc4cccc4)nc23                | 0.7782 | 2.4565 |
| 203^ | CHEMBL1097424 | 388.35 | Cn1nc(C(=O)N)c2CCc3cnc(Nc4cccc(c4)C(F)(F)F)nc3c12             | 1.7076 | 2.9747 |
| 204^ | CHEMBL1097071 | 388.35 | Cn1nc(C(=O)N)c2CCc3cnc(Nc4cccc4C(F)(F)F)nc3c12                | 2.6355 | 2.9611 |
| 205  | CHEMBL1097429 | 388.35 | Cn1nc(C(=O)N)c2CCc3cnc(Nc4ccc(cc4)C(F)(F)F)nc3c12             | 2.9405 | 2.9854 |
| 206  | CHEMBL1231522 | 388.42 | COc1cc(cc(OC)c1OC)c2cnc(N)c(n2)N3CCC(CC3)C(=O)O               | 4.3541 | 3.4526 |
| 207  | CHEMBL1094402 | 388.47 | NC(=O)c1nn(C2CCCC2)c3c1CCc4cnc(Nc5cccc5)nc34                  | 2.1553 | 3.0695 |
| 208* | CHEMBL563028  | 388.47 | Cn1nc(C(=O)N)C2CCCC2)c3CCc4cnc(Nc5cccc5)nc4c13                | 4.0000 | 3.2584 |
| 209* | CHEMBL3394757 | 390.52 | OC(CN1CCCC1)Cn2cc(CCC(=O)c3cccc3)c4cccc24                     | 3.2601 | 3.8710 |
| 210* | CHEMBL2407747 | 392.45 | CCc1ccc2NC(=O)\C(=C\c3ccc4c(\C=C\c5ccncc5)n[nH]c4c3)\c2c1     | 4.0000 | 3.9347 |
| 211  | CHEMBL553     | 393.44 | COCCOc1cc2nenc(Nc3cccc(c3)C#C)c2cc1OCCOC                      | 5.0000 | 3.7011 |
| 212  | CHEMBL522125  | 393.48 | C[C@H](Nc1cc2c(noc2n1)C3CCCN(CCC(=O)N)C3)c4cccc4              | 3.8738 | 3.1445 |
| 213  | CHEMBL188343  | 393.49 | C1CCC(CC1)Nc2nc(Nc3ccc(cc3)N4CCOCC4)nc5[nH]cnc25              | 3.6990 | 3.8498 |
| 214  | CHEMBL2407748 | 394.43 | COc1ccc2NC(=O)\C(=C\c3ccc4c(\C=C\c5ccncc5)n[nH]c4c3)\c2c1     | 4.0000 | 4.3088 |
| 215* | CHEMBL2407894 | 394.43 | COc1ccc2NC(=O)\C(=C\c3ccc4c(\C=C\c5ccncc5)n[nH]c4c3)\c2c1     | 4.0000 | 4.3091 |
| 216  | CHEMBL2401961 | 394.45 | CC(C)N1c2nc(ncc2N(C)C(=O)C1(C)C)n3ccnc3c4ccc(F)cc4            | 5.0000 | 4.7199 |
| 217^ | CHEMBL2407904 | 394.65 | COc1cc(\C=C\2/C(=O)N(C)c3ccc(Br)cc23)cc(Cl)c1O                | 4.0000 | 4.3689 |

|      |               |        |                                                                           |        |        |
|------|---------------|--------|---------------------------------------------------------------------------|--------|--------|
| 218  | CHEMBL3606021 | 395.42 | NC(=O)c1cc(F)cc2CN(C3CCN(CC3)C4CCC(F)(F)CC4)C(=O)c12                      | 4.0000 | 3.4451 |
| 219* | CHEMBL1094817 | 396.44 | Cn1nc(C(=O)N)c2CCc3cnc(Nc4ccccc4c5ccccc5)nc3c12                           | 3.1945 | 3.0379 |
| 220  | CHEMBL563150  | 396.44 | Cn1nc(C(=O)Nc2ccccc2)c3CCc4cnc(Nc5ccccc5)nc4c13                           | 4.0000 | 3.1653 |
| 221  | CHEMBL518060  | 396.61 | CC(C)C\C=C\[C@@H](C)[C@H]1CC[C@H]2[C@H](CCc3cc(O)ccc3C)C(=O)CC[C@]12C     | 5.0000 | 5.0506 |
| 222  | CHEMBL2324036 | 397.43 | Cc1cc(c(OCCO)c(c1)c2ccc(cc2)c3nnn[nH]3)c4ccc(cc4)C#N                      | 5.1614 | 3.7113 |
| 223  | CHEMBL535     | 398.47 | CCN(CC)CCNC(=O)c1c(C)[nH]c(\C=C\2/C(=O)Nc3ccc(F)cc23)c1C                  | 4.0000 | 3.7220 |
| 224^ | CHEMBL1922224 | 398.62 | CC(C)C\C=C\[C@@H](C)[C@H]1CC[C@H]2[C@H](CCc3cc(O)ccc3C)[C@@H](O)CC[C@]12C | 5.0000 | 4.8066 |
| 225^ | CHEMBL456936  | 398.62 | CC(C)CCC[C@@H](C)[C@H]1CC[C@H]2[C@H](CCc3cc(O)ccc3C)C(=O)CC[C@]12C        | 5.0000 | 5.0692 |
| 226* | CHEMBL2407750 | 398.84 | Clc1ccc2NC(=O)\C=C\c3ccc4c(\C=C\c5cncnc5)n[nH]c4c3)\c2c1                  | 4.0000 | 4.3401 |
| 227  | CHEMBL1094816 | 399.43 | Cn1nc(C(=O)N)c2CCc3cnc(Nc4ccccc4S(=O)(=O)N)nc3c12                         | 3.5721 | 2.9977 |
| 228  | CHEMBL517956  | 400.64 | CC(C)CCC[C@@H](C)[C@H]1CC[C@H]2[C@H](CCc3cc(O)ccc3C)[C@H](O)CC[C@]12C     | 5.0000 | 4.8143 |
| 229* | CHEMBL2401963 | 402.49 | CC[C@H]1N(C2CCCC2)c3nc(ncc3N(C)C1=O)n4ccnc4c5ccccc5                       | 0.9031 | 3.7675 |
| 230* | CHEMBL1098057 | 403.48 | CN1CCC(CC1)n2nc(C(=O)N)c3CCc4cnc(Nc5ccccc5)nc4c23                         | 4.0000 | 3.0373 |
| 231  | CHEMBL1272089 | 404.35 | Cn1nc(C(=O)N)c2CCc3cnc(Nc4ccccc4OC(F)(F)F)nc3c12                          | 2.0682 | 1.5210 |
| 232  | CHEMBL2401971 | 404.46 | CC[C@H]1N([C@H]2CCOC2)c3nc(ncc3N(C)C1=O)n4ccnc4c5ccccc5                   | 2.5798 | 3.7075 |
| 233^ | CHEMBL2401972 | 404.46 | CC[C@H]1N([C@@H]2CCOC2)c3nc(ncc3N(C)C1=O)n4ccnc4c5ccccc5                  | 2.6812 | 3.7075 |
| 234^ | CHEMBL2401960 | 406.46 | CC(C)N1c2nc(ncc2N(C)C(=O)C13CCC3)n4ccnc4c5ccc(F)cc5                       | 4.4031 | 4.7764 |
| 235  | CHEMBL2407744 | 407.42 | OC(=O)c1ccc(\C=C\c2n[nH]c3cc(\C=C/4\C(=O)Nc5ccccc5)ccc23)cc1              | 4.0000 | 3.9257 |
| 236* | CHEMBL2402085 | 407.45 | CC[C@H]1N(c2cn[nH]c2)c3nc(ncc3N(C)C1=O)c4cn[nH]c4c5nccs5                  | 3.4814 | 3.6202 |
| 237^ | CHEMBL2047943 | 407.51 | Cc1cc(ccc1Nc2nc(NC3CCCC3)c4nc[nH]c4n2)N5CCOCC5                            | 3.6990 | 3.8498 |
| 238* | CHEMBL490814  | 407.89 | C[C@H](Nc1cc2c(noc2cn1)c3cc(Cl)cc(CCCO)c3)c4ccccc4                        | 1.9956 | 3.2559 |
| 239* | CHEMBL2401970 | 408.43 | CC[C@H]1N(C2COC2)c3nc(ncc3N(C)C1=O)n4ccnc4c5ccc(F)cc5                     | 4.6990 | 3.6801 |
| 240^ | CHEMBL1094488 | 410.47 | Cn1nc(C(=O)N)c2CCc3cnc(Nc4ccccc4Cc5ccccc5)nc3c12                          | 2.9745 | 3.0407 |
| 241* | CHEMBL2401974 | 410.47 | CCC1N(c2ccccc2)c3nc(ncc3N(C)C1=O)n4ccnc4c5ccccc5                          | 3.4518 | 3.6498 |
| 242  | CHEMBL562030  | 410.47 | Cn1nc(C(=O)Nc2ccccc2)c3CCc4cnc(Nc5ccccc5)nc4c13                           | 4.0000 | 3.1913 |
| 243  | CHEMBL1922225 | 410.63 | CC(C)C(=C)CC[C@@H](C)[C@H]1CC[C@H]2[C@H](CCc3cc(O)ccc3C)C(=O)CC[C@]12C    | 5.0000 | 5.0561 |
| 244  | CHEMBL1094820 | 411.46 | Cn1nc(C(=O)N)c2CCc3cnc(Nc4ccccc4Nc5ccccc5)nc3c12                          | 2.9773 | 3.0326 |
| 245  | CHEMBL2402084 | 411.48 | CC[C@H]1N([C@H]2CCOC2)c3nc(ncc3N(C)C1=O)c4cn[nH]c4c5nccs5                 | 3.1492 | 3.7138 |
| 246* | CHEMBL1096095 | 412.44 | Cn1nc(C(=O)N)c2CCc3cnc(Nc4ccccc4Oc5ccccc5)nc3c12                          | 2.4440 | 1.5861 |
| 247  | CHEMBL2402077 | 412.45 | CC[C@H]1N(c2cnnc2)c3nc(ncc3N(C)C1=O)n4ccnc4c5ccccc5                       | 3.8899 | 3.5898 |
| 248^ | CHEMBL515982  | 412.65 | CC(C)C(=C)CC[C@@H](C)[C@H]1CC[C@H]2[C@H](CCc3cc(O)ccc3C)[C@H](O)C[C@]12C  | 5.0000 | 5.4551 |



|      |               |        |                                                                                  |        |        |
|------|---------------|--------|----------------------------------------------------------------------------------|--------|--------|
| 249  | CHEMBL3798011 | 413.47 | C[C@@H](N1c2cc(ccc2C(=O)NC1(C)C)N3C(=O)Nc4ncccc34)c5ccccc5                       | 3.0000 | 3.6268 |
| 250^ | CHEMBL3109401 | 413.59 | CC(C)CCNC1=CC(=O)C(=C(C[C@]2(C)[C@@H](C)CC[C@]3(C)[C@H]2CCC=C3C)C1=O)O           | 5.0000 | 4.5329 |
| 251  | CHEMBL456294  | 414.62 | CC(C)CCC[C@@H](C)[C@H]1[C@@H](O)C[C@H]2[C@H](CCc3cc(O)ccc3C)C(=O)CC[C@]12C       | 5.0000 | 4.9738 |
| 252^ | CHEMBL2401957 | 415.45 | CCC1N(c2cnn(C)c2)c3nc(ncc3N(C)C1=O)c4cn[nH]c4c5ccccc5                            | 3.2601 | 3.6102 |
| 253^ | CHEMBL1276848 | 416.47 | COc1cc(cc(OC)c1OC)c2cnc(N)c(n2)N3CC[C@H]([C@@H](C)[C@H]3C)C(=O)O                 | 4.2878 | 3.4501 |
| 254^ | CHEMBL464351  | 416.64 | CC(C)CCC[C@@H](C)[C@H]1[C@@H](O)C[C@H]2[C@H](CCc3cc(O)ccc3C)[C@H](O)CC[C@]12C    | 5.0000 | 4.7906 |
| 255  | CHEMBL1098058 | 417.51 | NC(=O)c1nn(CCN2CCCC2)c3c1CCc4cnc(Nc5ccccc5)nc34                                  | 4.0000 | 3.0144 |
| 256* | CHEMBL2402079 | 418.43 | CCC1N(c2cc[nH]n2)c3nc(ncc3N(C)C1=O)n4ccnc4c5ccc(F)cc5                            | 3.5340 | 3.5734 |
| 257^ | CHEMBL2402078 | 418.43 | CC[C@H]1N(c2cn[nH]c2)c3nc(ncc3N(C)C1=O)n4ccnc4c5ccc(F)cc5                        | 3.9380 | 3.5887 |
| 258^ | CHEMBL445162  | 418.85 | CS(=O)(=O)c1cccc(Nc2nccc(Nc3c(Cl)ccc4OCOC34)n2)c1                                | 4.4771 | 2.9271 |
| 259* | CHEMBL1269042 | 419.36 | Cn1nc(C(=O)N)c2CCc3cnc(Nc4cc(N)ccc4OC(F)(F)F)nc3c12                              | 1.8633 | 1.5112 |
| 260  | CHEMBL1290746 | 420.4  | Cc1ccc(cc1NC(=O)c2cnn(c2N)c3cccc3F)C(=O)Nc4ccon4                                 | 4.1761 | 4.1126 |
| 261  | CHEMBL2407897 | 420.51 | CN(C)Cc1ccc(\C=C\c2n[nH]c3cc(\C=C/4\C(=O)Nc5ccccc45)ccc23)cc1                    | 4.0000 | 4.3316 |
| 262  | CHEMBL491021  | 420.89 | C[C@H](Nc1cc2c(noc2cn1)c3cc(Cl)cc(CCC(=O)N)c3)c4ccccc4                           | 1.7076 | 3.1145 |
| 263  | CHEMBL2402086 | 421.48 | CCC1N(c2cnn(C)c2)c3nc(ncc3N(C)C1=O)c4cn[nH]c4c5nccs5                             | 3.2601 | 3.6235 |
| 264  | CHEMBL2401973 | 422.46 | CC[C@H]1N([C@H]2CCOC2)c3nc(ncc3N(C)C1=O)n4ccnc4c5ccc(F)cc5                       | 3.8768 | 3.6823 |
| 265* | CHEMBL1094821 | 424.45 | Cn1nc(C(=O)N)c2CCc3cnc(Nc4cccc4C(=O)c5ccccc5)nc3c12                              | 3.2942 | 3.0119 |
| 266* | CHEMBL1808335 | 424.5  | Cn1nc(C(=O)N)CCc2cccc2)c3CCc4cnc(Nc5ccccc5)nc4c13                                | 4.0000 | 3.2068 |
| 267* | CHEMBL2402083 | 425.51 | CC[C@H]1N(C2CCOCC2)c3nc(ncc3N(C)C1=O)c4cn[nH]c4c5nccs5                           | 2.3979 | 3.7327 |
| 268  | CHEMBL590109  | 425.51 | NCCn1cc(c2cc(c3cc4cccc4s3)c5[nH]ncc5c2)c6nc(N)ccc16                              | 4.0000 | 3.8238 |
| 269* | CHEMBL493326  | 427.9  | COc1ccc2nnc(c3cc(O[C@H](C)c4cccc4Cl)c(s3)C(=O)N)c2c1                             | 0.0000 | 0.7523 |
| 270  | CHEMBL598024  | 428.23 | Ic1ccc(Nc2ncc3CC(=O)Nc4cccc4c3n2)cc1                                             | 4.1761 | 4.3446 |
| 271  | CHEMBL428496  | 428.43 | COC[C@H]1OC(=O)c2coc3C(=O)C4=C([C@@H](C[C@@]5(C)[C@H]4CCC5=O)OC(=O)C)[C@]1(C)c23 | 1.3802 | 3.0378 |
| 272  | CHEMBL1094822 | 428.51 | Cn1nc(C(=O)N)c2CCc3cnc(Nc4cccc4Sc5ccccc5)nc3c12                                  | 3.3081 | 3.0453 |
| 273^ | CHEMBL2380587 | 428.53 | CC(=O)Nc1cccc(c1)c2n[nH]c3cc(c(NC4CCCC4)cc23)c5cnn(C)c5                          | 3.6990 | 3.8722 |
| 274* | CHEMBL2401966 | 430.43 | CC[C@H]1N(CCC(F)(F)F)c2nc(ncc2N(C)C1=O)n3ccnc3c4cccc4                            | 2.3979 | 3.4325 |
| 275  | CHEMBL1689163 | 431.43 | CC(Oc1cc(sc1C(=O)N)n2cnc3cccc23)c4cccc4C(F)(F)F                                  | 0.9542 | 0.5073 |
| 276* | CHEMBL599428  | 431.49 | Cn1nc(C(=O)N)c2CCc3cnc(NC4CCN(CC4)C(=O)c5ccccc5)nc3c12                           | 4.0000 | 3.0428 |
| 277  | CHEMBL3809829 | 431.53 | COc1cc(ccc1Nc2ncc3cnc(N[C@@H](C)C(C)(C)C)c3n2)c4cnn(C)c4                         | 5.0000 | 3.3365 |
| 278  | CHEMBL2402081 | 432.45 | CC[C@H]1N(c2cnn(C)n2)c3nc(ncc3N(C)C1=O)n4ccnc4c5ccc(F)cc5                        | 3.1303 | 3.5767 |
| 279* | CHEMBL2402080 | 432.45 | CC[C@H]1N(c2cnn(C)c2)c3nc(ncc3N(C)C1=O)n4ccnc4c5ccc(F)cc5                        | 3.5172 | 3.5920 |
| 280* | CHEMBL2402082 | 432.45 | CC[C@H]1N(c2nc(ncc2N(C)C1=O)n3ccnc3c4ccc(F)cc4)c5cnn5C                           | 4.4594 | 3.5860 |
| 281^ | CHEMBL3353347 | 434.53 | CN(C)Cc1ccc(\C=C\c2n[nH]c3cc(ccc23)[C@H]4C[C@@]45C(=O)Nc6ccccc56)cc1             | 5.0000 | 4.7421 |

|      |               |        |                                                                    |         |        |
|------|---------------|--------|--------------------------------------------------------------------|---------|--------|
| 282  | CHEMBL3310151 | 435.45 | CN1CCN(CC1)c2cc(F)c3c(c2)nc(Cc4ccc5OCOc5c4)n6nc(N)nc36             | 4.0000  | 3.8514 |
| 283  | CHEMBL2407905 | 439.1  | COc1cc(\C=C\2/C(=O)Nc3ccc(Br)cc23)cc(Br)c1OC                       | 4.0000  | 4.3469 |
| 284* | CHEMBL1614712 | 439.55 | Nc1ncnc2c1c(cn2)[C@@H]3C[C@H](CN4CCC4)C3)c5cccc(OCc6cccc6)c5       | 4.0000  | 3.8551 |
| 285  | CHEMBL3651966 | 440.46 | C[C@@H]1C[C@H](N)C[C@@H](C1)c2ccnc2NC(=O)c3ccc(F)c(n3)c4c(F)cccc4F | 4.0000  | 3.0405 |
| 286  | CHEMBL489083  | 441.5  | NC(=N)SCCCN1C(=O)C2=C(C1=O)n3c(cc4cccc34)c5cccc6ccn2c56            | 3.9956  | 3.6260 |
| 287^ | CHEMBL2401969 | 442.44 | CC[C@H]1N(C2CC(F)(F)C2)c3nc(ncc3N(C)C1=O)n4ccnc4c5ccc(F)cc5        | 3.9727  | 3.5521 |
| 288^ | CHEMBL514162  | 443.9  | COc1cc2nnc(c3cc(OCc4cccc4Cl)c(s3)C(=O)N)c2cc1OC                    | 0.3010  | 1.4208 |
| 289  | CHEMBL604087  | 445.51 | COc1ccc(cc1OC)C(=O)NCc2cccc(c2)C(=O)Nc3ccc4CCNCc4c3                | 4.0000  | 2.7152 |
| 290  | CHEMBL2401975 | 446.45 | CCC1N(c2ccc(F)cc2)c3nc(ncc3N(C)C1=O)n4ccnc4c5ccc(F)cc5             | 3.3692  | 3.5556 |
| 291  | CHEMBL2401967 | 448.42 | CC[C@H]1N(CCC(F)(F)F)c2nc(ncc2N(C)C1=O)n3ccnc3c4ccc(F)cc4          | 3.5502  | 3.4086 |
| 292^ | CHEMBL1094408 | 448.52 | COc1ccc(cc1Nc2ncc3CCc4c(nn(C)c4c3n2)C(=O)N)N5CCN(C)CC5             | 0.8451  | 1.5924 |
| 293* | CHEMBL1095717 | 448.52 | COc1ccc(cc1Nc2ncc3CCc4c(nn(C)c4c3n2)C(=O)N)N5CCN(C)CC5             | 1.6021  | 1.5931 |
| 294  | CHEMBL2332840 | 448.79 | FC(F)(F)c1cc(NC(=O)Nc2ccc(Oc3nnc4[nH]ncc34)cc2)ccc1Cl              | 4.0000  | 4.0561 |
| 295  | CHEMBL2401956 | 450.44 | CC[C@H]1N(c2cnn(C)c2)c3nc(ncc3N(C)C1=O)c4cn[nH]c4c5ccc(F)cc5F      | 3.1004  | 3.5593 |
| 296  | CHEMBL2407898 | 450.53 | COc1ccc2NC(=O)\C=C\c3ccc4c(\C=C\c5ccc(CN(C)C)cc5)n[nH]c4c3)\c2c1   | 4.0000  | 4.3110 |
| 297  | CHEMBL2380586 | 450.56 | Cn1cc(cn1)c2cc3[nH]nc(c4cccc(c4)S(=O)(=O)N)c3cc2NC5CCCCC5          | 3.6990  | 3.9089 |
| 298  | CHEMBL1241855 | 451.49 | COc1cc(OC)c(\C=C\S(=O)(=O)Cc2ccc(OC)c(NCC(=O)O)c2)c(OC)c1          | 0.9542  | 2.4431 |
| 299  | CHEMBL2443138 | 452.5  | CN(C)c1ccc(Oc2cc(O)cc(O)c2c3onc(c3)C(=O)NC4CCN(C)CC4)cc1           | 1.0000  | 2.0277 |
| 300  | CHEMBL497949  | 452.55 | NC(=O)c1ccc2\C=C(\Nc3ccc(CN4CCCC4)cc3)/c5cccc5)\C(=O)Nc2c1         | 4.0000  | 3.7482 |
| 301^ | CHEMBL1808334 | 452.55 | CCc1cccc(CC)c1NC(=O)c2nn(C)c3c2CCc4cnc(Nc5cccc5)nc34               | 4.0000  | 5.8629 |
| 302* | CHEMBL2402076 | 453.47 | CCC1N(c2ccc(cc2)C#N)c3nc(ncc3N(C)C1=O)n4ccnc4c5ccc(F)cc5           | 3.5752  | 3.5748 |
| 303^ | CHEMBL2443044 | 454.43 | CN1CCC(CC1)NC(=O)c2cc(on2)c3c(O)cc(O)cc3Oc4ccc(cc4)[N+](=O)[O-]    | 1.0000  | 1.9907 |
| 304  | CHEMBL2333365 | 455.5  | Cc1c(F)c(ccc1C(=O)N2CCOc3ccc(cc3C2)c4ccc(N)nc4)S(=O)(=O)C          | 4.0000  | 3.5339 |
| 305  | CHEMBL2401968 | 456.46 | CCC1N(C2CCC(F)(F)C2)c3nc(ncc3N(C)C1=O)n4ccnc4c5ccc(F)cc5           | 2.5051  | 3.5542 |
| 306  | CHEMBL222419  | 457.93 | COc1cc2nnc(c3cc(O[C@H](C)c4cccc4Cl)c(s3)C(=O)N)c2cc1OC             | -0.0969 | 0.7374 |
| 307  | CHEMBL521806  | 457.93 | COc1cc2nnc(c3cc(O[C@H](C)c4cccc4Cl)c(s3)C(=O)N)c2cc1OC             | 1.4771  | 0.7374 |
| 308  | CHEMBL1089082 | 459.42 | FC(F)(F)c1cccc(c1)C(=O)Nc2cccc(c2)c3ccnc4cc(nn34)c5ccncc5          | 4.6990  | 4.0695 |
| 309^ | CHEMBL3218002 | 459.48 | ONC(=O)\C=C\c1ccn(c1)S(=O)(=O)c2ccc3nnc(Nc4cccc(c4)C#C)c3c2        | 5.0000  | 4.0324 |
| 310^ | CHEMBL1095716 | 460.53 | CN1CCN(CC1)c2ccc(C(=O)C)c(Nc3ncc4CCc5c(nn(C)c5c4n3)C(=O)N)c2       | 2.0374  | 3.0182 |
| 311  | CHEMBL1096028 | 460.53 | CN1CCN(CC1)c2ccc(Nc3ncc4CCc5c(nn(C)c5c4n3)C(=O)N)c(c2)C(=O)C       | 2.6665  | 3.0189 |
| 312* | CHEMBL1097374 | 460.53 | CN1CCN(CC1)c2cccc(Nc3ncc4CCc5c(nn(C)c5c4n3)C(=O)N)c2C(=O)C         | 3.3120  | 3.0182 |
| 313  | CHEMBL1933578 | 461.44 | Cn1cc(cc1c2ccnc(Nc3cc(ccc3OC(F)(F)F)N4CCNCC4)n2)C(=O)N             | 1.2553  | 2.1318 |
| 314^ | CHEMBL522709  | 461.46 | COc1cc2nnc(c3cc(O[C@H](C)c4cccc4Cl)c(s3)C(=O)N)c2cc1OC             | 0.4771  | 0.4891 |
| 315^ | CHEMBL2401959 | 462.44 | CCC1(C)N(CCC(F)(F)F)c2nc(ncc2N(C)C1=O)n3ccnc3c4ccc(F)cc4           | 3.8549  | 4.2792 |
| 316  | CHEMBL2407899 | 462.55 | CN1CCN(CC1)c2ccc(\C=C\c3n[nH]c4cc(\C=C/5\C(=O)Nc6cccc56)ccc34)cn2  | 4.0000  | 3.8629 |
| 317  | CHEMBL1689159 | 462.56 | CN1CCC(CC1)Oc2ccc3nnc(c4cc(OCc5cccc5)c(s4)C(=O)N)c3c2              | 1.8388  | 0.8729 |
| 318^ | CHEMBL1200485 | 464.82 | CNC(=O)c1cc(Oc2ccc(NC(=O)Nc3ccc(Cl)c(c3)C(F)(F)F)cc2)ccn1          | 4.0000  | 2.3959 |

|      |               |        |                                                                           |        |        |
|------|---------------|--------|---------------------------------------------------------------------------|--------|--------|
| 319* | CHEMBL2443139 | 466.53 | CC(C)Nc1ccc(Oc2cc(O)cc(O)c2c3onc(c3)C(=O)NC4CCN(C)CC4)cc1                 | 1.0000 | 2.0272 |
| 320  | CHEMBL388978  | 466.53 | CN[C@@H]1C[C@H]2O[C@@](C)([C@@H]1OC)n3c4cccc4c5c6CNC(=O)c6c7c8ccc8n2c7c35 | 2.5441 | 3.5740 |
| 321  | CHEMBL3745885 | 467.45 | CN1C(=O)C(=C2cnc(Nc3ccc4[nH]ccc4c3)nc12)S(=O)(=O)c5ccc(F)cc5F             | 4.0000 | 3.9785 |
| 322  | CHEMBL1242101 | 468.46 | CC(=O)Nc1ccc(Nc2ncc(c(Nc3cccc3C(=O)c4cccc4)n2)[N+](=O)[O-])cc1            | 2.9542 | 4.2571 |
| 323  | CHEMBL2178352 | 468.6  | CN1CCN(CC1)c2ccc(Nc3ncc4nc(Nc5cccc5)n(C6CCCC6)c4n3)cc2                    | 4.0000 | 3.8179 |
| 324  | CHEMBL475817  | 469.24 | Nc1ncc(NC(=O)c2cc(NC(=O)c3cccc(c3)C(F)(F)F)ccc2Cl)cc1Cl                   | 4.4771 | 4.0384 |
| 325  | CHEMBL1209674 | 474.96 | C[C@@H](Oc1cc(sc1C(=O)N)n2cnc3cc(ccc23)c4ccncc4)c5cccc5Cl                 | 0.0000 | 0.7535 |
| 326* | CHEMBL1209675 | 474.96 | C[C@@H](Oc1cc(sc1C(=O)N)n2cnc3ccc(cc23)c4ccncc4)c5cccc5Cl                 | 0.3010 | 0.7505 |
| 327^ | CHEMBL1933576 | 475.47 | CN1CCN(CC1)c2ccc(OC(F)(F)F)c(Nc3nccc(n3)c4cc(cn4C)C(=O)N)c2               | 1.1761 | 2.1322 |
| 328* | CHEMBL1689160 | 476.59 | CC(Oc1cc(sc1C(=O)N)n2cnc3ccc(OC4CCN(C)CC4)cc23)c5cccc5                    | 1.8195 | 0.7471 |
| 329  | CHEMBL259084  | 476.86 | OC(=O)c1ccc(Nc2ncc3CN=C(c4cc(Cl)ccc4c3n2)c5c(F)cccc5F)cc1                 | 4.7243 | 3.8966 |
| 330  | CHEMBL514499  | 477.46 | COc1cc2ncc(c3cc(OCc4cccc4C(F)(F)F)c(s3)C(=O)N)c2cc1OC                     | 0.3010 | 1.3125 |
| 331  | CHEMBL3330409 | 477.58 | CCc1cccc1C(N(C)C)C(=O)Nc2ccc3[nH]nc(c4cccc(c4)S(=O)(=O)N)c3c2             | 4.6990 | 3.8792 |
| 332* | CHEMBL1209842 | 477.97 | C[C@@H](Oc1cc(sc1C(=O)N)n2cnc3cc(ccc23)c4cnn(C)c4)c5cccc5Cl               | 0.0000 | 0.7525 |
| 333^ | CHEMBL1209843 | 477.97 | C[C@@H](Oc1cc(sc1C(=O)N)n2cnc3ccc(cc23)c4cnn(C)c4)c5cccc5Cl               | 0.0000 | 0.7493 |
| 334^ | CHEMBL1242977 | 479.45 | CNc1nccc(n1)c2ccncc2Oc3ccc(NC(=O)c4cccc(c4)C(F)(F)F)cc3C                  | 3.9031 | 4.0622 |
| 335^ | CHEMBL3330410 | 481.59 | NS(=O)(=O)c1cccc(c1)c2n[nH]c3ccc(NC(=O)C(N4CCCC4)c5ccsc5)cc23             | 4.6990 | 3.9151 |
| 336  | CHEMBL1808336 | 482.58 | CCc1cccc(CC)c1NC(=O)c2nn(C)c3c2CCc4ncc(Nc5cccc5OC)nc34                    | 4.0000 | 4.4094 |
| 337  | CHEMBL525203  | 484.55 | COC(=O)c1ccc2\C=C(\Nc3ccc(CN(C)C(=O)N(C)C)cc3)/c4cccc4\C(=O)Nc2c1         | 4.0000 | 4.1477 |
| 338  | CHEMBL3218000 | 485.54 | Nc1cccc1NC(=O)c2ccc(COc3ccc4ncc(Nc5cccc(c5)C#C)c4c3)cc2                   | 5.0000 | 4.2591 |
| 339^ | CHEMBL1794067 | 487.96 | C[C@@H](Oc1cc(sc1C(=O)N)n2cnc3ccc(OC[C@@H](O)CO)cc23)c4cccc4Cl            | 0.0000 | 0.7211 |
| 340  | CHEMBL1271644 | 488.47 | Cn1nc(C(=O)N)c2CCc3ncc(Nc4cc(ccc4OC(F)(F)F)N5CCNCC5)nc3c12                | 0.3010 | 1.5155 |
| 341  | CHEMBL1793891 | 488.47 | CN1CCN(CC1)c2ccc(OC(F)(F)F)c(Nc3ncc4CCc5c(n[nH]c5c4n3)C(=O)N)c2           | 0.6021 | 1.5076 |
| 342^ | CHEMBL1271591 | 488.47 | Cn1nc(C(=O)N)c2CCc3ncc(Nc4cc(NC5CCNC5)ccc4OC(F)(F)F)nc3c12                | 1.8865 | 1.5142 |
| 343  | CHEMBL1774332 | 488.47 | Cn1nc(C(=O)N)c2CCc3ncc(Nc4cc(NC5CCCN5)ccc4OC(F)(F)F)nc3c12                | 1.9191 | 1.5088 |
| 344  | CHEMBL1243200 | 488.54 | CNc1nccc(n1)c2ccncc2Oc3ccc(NC(=O)c4cccc4Nc5cccc5)cc3                      | 3.0000 | 4.2639 |
| 345^ | CHEMBL2042135 | 490.54 | C[C@@H](Oc1cc(ccc1C(=O)N)c2cc(cnc2N)c3cc(CN(C)C)cs3)\C=C/C(F)(F)F         | 3.7649 | 3.2318 |
| 346  | CHEMBL2042041 | 490.54 | CC(Oc1cc(ccc1C(=O)N)c2cc(cnc2N)c3cc(CN(C)C)cs3)\C=C/C(F)(F)F              | 3.9248 | 3.2318 |
| 347* | CHEMBL2042042 | 490.54 | C[C@H](Oc1cc(ccc1C(=O)N)c2cc(cnc2N)c3cc(CN(C)C)cs3)\C=C/C(F)(F)F          | 4.6990 | 3.2318 |
| 348^ | CHEMBL2407900 | 492.57 | COc1ccc2NC(=O)\C=C\c3ccc4c(\C=C\c5ccc(nc5)N6CCN(C)CC6)n[nH]c4c3)\c2c1     | 4.0000 | 3.8399 |
| 349  | CHEMBL1092830 | 494.45 | Cc1oc(c(NC(=O)\N=C/2\NC=C(CCNc3cc(Nc4nc[nH]n4)ncn3)S2)c1)C(F)(F)F         | 2.8573 | 3.3796 |
| 350  | CHEMBL3109933 | 494.97 | CN(C)C(=O)c1ccc(Nc2cc3c(cn2)cc(c4cnn(C)c4)n3C(=O)OC(C)(C)C)c(Cl)c1        | 5.0000 | 4.5995 |
| 351* | CHEMBL1209758 | 496.5  | C[C@@H](Oc1cc(sc1C(=O)N)n2cnc3cc(ccc23)c4ccc[nH]4)c5cccc5C(F)(F)F         | 0.6990 | 0.4939 |
| 352* | CHEMBL1209759 | 497.49 | C[C@@H](Oc1cc(sc1C(=O)N)n2cnc3cc(ccc23)c4cn[nH]c4)c5cccc5C(F)(F)F         | 0.0000 | 0.4886 |
| 353  | CHEMBL1964261 | 499.02 | C[C@@H](Oc1cc(sc1C(=O)N)n2cnc3ccc(OCCCN(C)C)cc23)c4cccc4Cl                | 0.6021 | 0.7511 |

|      |               |        |                                                                              |        |        |
|------|---------------|--------|------------------------------------------------------------------------------|--------|--------|
| 354* | CHEMBL1774327 | 499.49 | CN1CCC(=CC1)c2ccc(OC(F)(F)F)c(Nc3ncc4CCc5c(nn(C)c5c4n3)C(=O)N)c2             | 0.4771 | 1.5159 |
| 355* | CHEMBL1774328 | 500.52 | CN1CCC(CC1)c2ccc(OC(F)(F)F)c(Nc3ncc4CCc5c(en(C)c5c4n3)C(=O)N)c2              | 0.7782 | 2.1287 |
| 356* | CHEMBL1933582 | 501.5  | CN1CCN(CC1)c2ccc(OC(F)(F)F)c(Nc3nccc(n3)c4cc5C(=O)NCCc5n4C)c2                | 0.9542 | 2.3318 |
| 357  | CHEMBL2401958 | 502.39 | CN1C(=O)C(CC(F)(F)F)N(CCC(F)(F)F)c2nc(ncc12)n3ccnc3c4ccc(F)cc4               | 3.5416 | 2.8772 |
| 358  | CHEMBL1272140 | 502.49 | CN1CCN(CC1)c2ccc(OC(F)(F)F)c(Nc3ncc4CCc5c(nn(C)c5c4n3)C(=O)N)c2              | 0.4771 | 1.5159 |
| 359* | CHEMBL1630117 | 504.9  | ONC(=O)c1oc(cc1)c2ccc3nnc(Nc4ccc(OCc5ccccc(F)c5)c(Cl)c4)c3c2                 | 3.3010 | 4.0279 |
| 360  | CHEMBL1933579 | 505.49 | CN1CCN(CC1)c2ccc(OC(F)(F)F)c(Nc3nccc(n3)c4cc(cn4CCO)C(=O)N)c2                | 2.1790 | 1.9956 |
| 361* | CHEMBL1209603 | 507.53 | C[C@@H](Oc1cc(sc1C(=O)N)n2cnc3cc(ccc23)c4cccc4)c5ccccc5C(F)(F)F              | 0.7782 | 0.4953 |
| 362* | CHEMBL1209604 | 507.53 | C[C@@H](Oc1cc(sc1C(=O)N)n2cnc3ccc(cc23)c4cccc4)c5ccccc5C(F)(F)F              | 1.2553 | 0.4931 |
| 363* | CHEMBL2392552 | 507.63 | COc1cc(ccc1Nc2ncc3N(C)C(=O)CCN(C4CCCC4)c3n2)C(=O)NC5CCN(C)CC5                | 1.0792 | 1.2011 |
| 364  | CHEMBL2348417 | 507.99 | OCCNC(=O)C1=Cc2c(Nc3ccc(Oc4cccc5seccc45)c(Cl)c3)nnc2NCC1                     | 4.0000 | 3.7126 |
| 365  | CHEMBL1209605 | 508.51 | C[C@@H](Oc1cc(sc1C(=O)N)n2cnc3cc(ccc23)c4ccncc4)c5ccccc5C(F)(F)F             | 0.0000 | 0.4903 |
| 366^ | CHEMBL1209676 | 508.51 | C[C@@H](Oc1cc(sc1C(=O)N)n2cnc3cc(ccc23)c4ccncc4)c5ccccc5C(F)(F)F             | 0.0000 | 0.4895 |
| 367* | CHEMBL1209606 | 508.51 | C[C@@H](Oc1cc(sc1C(=O)N)n2cnc3ccc(cc23)c4ccncc4)c5ccccc5C(F)(F)F             | 0.3010 | 0.4874 |
| 368  | CHEMBL1209677 | 508.51 | C[C@@H](Oc1cc(sc1C(=O)N)n2cnc3ccc(cc23)c4ccncc4)c5ccccc5C(F)(F)F             | 0.3010 | 0.4863 |
| 369* | CHEMBL1209756 | 508.51 | C[C@@H](Oc1cc(sc1C(=O)N)n2cnc3cc(ccc23)c4cccc4)c5ccccc5C(F)(F)F              | 0.7782 | 0.4885 |
| 370  | CHEMBL3785951 | 508.59 | CC(=O)N1CCN(CC1)[C@@H]2C[C@@H](C2)n3cc(c4cc(OC[C@@H]5CCCO5)ccc4F)c6c(N)nnc36 | 4.0000 | 3.7931 |
| 371  | CHEMBL3623375 | 509.62 | CN(C)CCCNC(=O)c1csc2nc(en12)c3ccc(NC(=O)Nc4cc(on4)C(C)(C)C)cc3               | 4.0000 | 4.0254 |
| 372  | CHEMBL1794070 | 511.04 | C[C@@H](Oc1cc(sc1C(=O)N)n2cnc3ccc(OC4CCN(C)CC4)cc23)c5ccccc5Cl               | 0.3010 | 0.7539 |
| 373  | CHEMBL1209841 | 511.52 | C[C@@H](Oc1cc(sc1C(=O)N)n2cnc3cc(ccc23)c4enn(C)c4)c5ccccc5C(F)(F)F           | 0.0000 | 0.4893 |
| 374^ | CHEMBL3297762 | 512.09 | CN1CCN(C[C@@H](NC(=O)C[C@H]2CNC(=O)c3cc(cn23)c4cccc(Cl)c4)C5CCCC5)CC1        | 4.0000 | 3.1847 |
| 375  | CHEMBL460702  | 512.89 | CCOC1=C(C(=O)Nc2ccc(Oc3ccnc(N)c3Cl)c(F)c2)C(=O)N(C=C1)c4ccc(F)cc4            | 3.3010 | 3.3760 |
| 376  | CHEMBL1209757 | 513.55 | C[C@@H](Oc1cc(sc1C(=O)N)n2cnc3cc(ccc23)c4cccc4)c5ccccc5C(F)(F)F              | 0.4771 | 0.5048 |
| 377^ | CHEMBL2392548 | 513.58 | CN1CCC(CC1)NC(=O)c2ccc(Nc3ncc4N(C)C(=O)C(F)(F)CN(C5CCCC5)c4n3)cc2            | 0.0000 | 2.9471 |
| 378* | CHEMBL1793896 | 514.5  | CN1CCN(CC1)c2ccc(OC(F)(F)F)c(Nc3ncc4CCc5c(nn(C=C)c5c4n3)C(=O)N)c2            | 0.7782 | 1.4843 |
| 379  | CHEMBL1087397 | 515.53 | CN(C)Cc1ccc(cc1)c2enn3c(ccnc23)c4cccc(NC(=O)c5ccccc5)C(F)(F)F)c4             | 3.3010 | 4.0717 |
| 380^ | CHEMBL1243326 | 515.54 | CNc1nccc(n1)c2ccncc2Oc3ccc(Nc4nnc(c5ccc(F)cc5)c6cccc46)cc3                   | 4.3979 | 4.3655 |
| 381  | CHEMBL1242482 | 516.34 | OC(=O)c1ccc(cc1)C(=O)\C(=C/c2ccc(F)c(c2)[N+](=O)[O-])\SCc3ccc(Br)cc3         | 4.6990 | 3.8629 |
| 382* | CHEMBL1774330 | 516.48 | Cn1nc(C(=O)N)c2CCc3cnc(Nc4cc(NC(=O)[C@@H]5CCCN5)ccc4OC(F)(F)F)nc3c12         | 1.6435 | 1.4364 |
| 383  | CHEMBL1793893 | 516.52 | CCn1nc(C(=O)N)c2CCc3cnc(Nc4cc(ccc4OC(F)(F)F)N5CCN(C)CC5)nc3c12               | 0.7782 | 1.5183 |
| 384  | CHEMBL1271590 | 516.52 | CCN1CCN(CC1)c2ccc(OC(F)(F)F)c(Nc3ncc4CCc5c(nn(C)c5c4n3)C(=O)N)c2             | 0.9031 | 1.5163 |
| 385^ | CHEMBL1272195 | 516.52 | CN1CCCN(CC1)c2ccc(OC(F)(F)F)c(Nc3ncc4CCc5c(nn(C)c5c4n3)C(=O)N)c2             | 1.3979 | 1.5163 |
| 386  | CHEMBL1272300 | 516.52 | CN1CCC(CC1)Nc2ccc(OC(F)(F)F)c(Nc3ncc4CCc5c(nn(C)c5c4n3)C(=O)N)c2             | 2.3010 | 1.5154 |
| 387* | CHEMBL1271645 | 518.49 | Cn1nc(C(=O)N)c2CCc3cnc(Nc4cc(ccc4OC(F)(F)F)N5CC[N+](C)([O-])CC5)nc3c12       | 2.1038 | 1.5036 |

|      |               |        |                                                                               |         |        |
|------|---------------|--------|-------------------------------------------------------------------------------|---------|--------|
| 388  | CHEMBL72365   | 520.94 | Oc1c(Br)cc(\ C=C\ 2/C(=O)Nc3ccc(I)cc23)cc1Br                                  | 3.6628  | 4.3567 |
| 389^ | CHEMBL1630118 | 520.96 | ONC(=O)c1ccc(s1)c2ccc3nenc(Nc4ccc(OCc5cccc(F)c5)c(Cl)c4)c3c2                  | 3.4624  | 4.1752 |
| 390^ | CHEMBL513909  | 521.65 | CC[C@H]1N(C2CCCC2)c3nc(Nc4ccc(cc4OC)C(=O)NC5CCN(C)CC5)ncc3N(C)C1=O            | -0.0809 | 1.1034 |
| 391  | CHEMBL2048912 | 522.02 | CC(C)(N)C(=O)NCCn1ccc2nenc(Nc3ccc(Oc4cccc5sncc45)c(Cl)c3)c12                  | 4.0000  | 4.5582 |
| 392  | CHEMBL1209844 | 522.54 | C[C@@H](Oc1cc(sc1C(=O)N)n2cnc3cc(ccc23)c4cnc(C)c4)c5cccc5C(F)(F)F             | 0.0000  | 0.4905 |
| 393* | CHEMBL1208835 | 523.53 | C[C@@H](Oc1cc(sc1C(=O)N)n2cnc3cc(ccc23)c4cnc(N)c4)c5cccc5C(F)(F)F             | 0.0000  | 0.4828 |
| 394^ | CHEMBL1208892 | 524.52 | C[C@@H](Oc1cc(sc1C(=O)N)n2cnc3cc(ccc23)c4cnc(N)n4)c5cccc5C(F)(F)F             | 0.0000  | 0.4760 |
| 395* | CHEMBL1208893 | 524.52 | C[C@@H](Oc1cc(sc1C(=O)N)n2cnc3cc(ccc23)c4cnc(N)nc4)c5cccc5C(F)(F)F            | 0.0000  | 0.4773 |
| 396  | CHEMBL1964264 | 525.06 | C[C@@H](Oc1cc(sc1C(=O)N)n2cnc3ccc(O[C@H]4CCCN(C)CC4)cc23)c5cccc5Cl            | 0.4771  | 0.7543 |
| 397^ | CHEMBL1964265 | 525.06 | C[C@@H](Oc1cc(sc1C(=O)N)n2cnc3ccc(O[C@H]4CCCN(C)CC4)cc23)c5cccc5Cl            | 0.6021  | 0.7543 |
| 398* | CHEMBL1794069 | 525.06 | C[C@@H](Oc1cc(sc1C(=O)N)n2cnc3ccc(OCC4CCN(C)CC4)cc23)c5cccc5Cl                | 0.7782  | 0.7545 |
| 399^ | CHEMBL1808338 | 525.6  | CCc1cccc(CC)c1NC(=O)c2nn(C)c3c2CCc4cnc(Nc5ccc(cc5OC)C(=O)N)nc34               | 3.4820  | 3.1176 |
| 400  | CHEMBL1689168 | 526.55 | CC(Oc1cc(ccc1C(=O)N)n2cnc3cc(OCCCN(C)C)ccc23)c4cccc4C(F)(F)F                  | 4.1818  | 3.1646 |
| 401* | CHEMBL2392551 | 527.61 | CN1CCC(CC1)NC(=O)c2ccc(Nc3ncc4N(C)C(=O)C(F)(F)CN(C5CCCC5)c4n3)cc2C            | 2.2788  | 2.9474 |
| 402* | CHEMBL103667  | 527.66 | Cc1ccc(cc1)n2nc(cc2NC(=O)Nc3ccc(OCCN4CCOCC4)c5cccc35)C(C)(C)C                 | 4.4771  | 4.4828 |
| 403^ | CHEMBL1271535 | 530.55 | CN1CCCC1CCNc2ccc(OC(F)(F)F)c(Nc3ncc4CCc5c(nn(C)c5c4n3)C(=O)N)c2               | 2.1335  | 1.5154 |
| 404* | CHEMBL1964263 | 530.56 | C[C@@H](Oc1cc(sc1C(=O)N)n2cnc3ccc(OCC4CCN(C)CC4)cc23)c5cccc5C(F)(F)F          | 0.4771  | 0.4901 |
| 405  | CHEMBL1614933 | 530.56 | CN1CCC(CC1)Oc2ccc3nnc(c4cc(OCc5cccc5C(F)(F)F)c(s4)C(=O)N)c3c2                 | 0.9542  | 0.7530 |
| 406  | CHEMBL597754  | 530.64 | CNC(=O)c1nn(C)c2c1CCc3cnc(NC4CCN(CC4)C(=O)C5CCN(CC5)S(=O)(=O)C)nc23           | 4.0000  | 3.1913 |
| 407^ | CHEMBL1630107 | 530.93 | ONC(=O)\ C=C\ c1oc(cc1)c2ccc3nenc(Nc4ccc(OCc5cccc(F)c5)c(Cl)c4)c3c2           | 4.0792  | 4.0647 |
| 408  | CHEMBL1774337 | 531.53 | CN1CCN(CC1)c2ccc(OC(F)(F)F)c(Nc3ncc4CCc5c(nn(CCN)c5c4n3)C(=O)N)c2             | 1.5185  | 1.4553 |
| 409* | CHEMBL1933584 | 531.53 | CN1CCN(CC1)c2ccc(OC(F)(F)F)c(Nc3nccc(n3)c4cc5C(=O)NCCc5n4CCO)c2               | 2.0086  | 2.2006 |
| 410^ | CHEMBL1738758 | 532.52 | CN1CCN(CC1)c2ccc(OC(F)(F)F)c(Nc3ncc4CCc5c(nn(CCO)c5c4n3)C(=O)N)c2             | 0.3010  | 1.3889 |
| 411  | CHEMBL1774334 | 532.52 | CN1CCN([C@H](CO)C1)c2ccc(OC(F)(F)F)c(Nc3ncc4CCc5c(nn(C)c5c4n3)C(=O)N)c2       | 2.1875  | 1.4672 |
| 412* | CHEMBL1774335 | 532.52 | CN1CCN([C@H](CO)C1)c2ccc(OC(F)(F)F)c(Nc3ncc4CCc5c(nn(C)c5c4n3)C(=O)N)c2       | 2.3032  | 1.4672 |
| 413^ | CHEMBL1774331 | 532.56 | CCN(CC)CCN(C)c1ccc(OC(F)(F)F)c(Nc2ncc3CCc4c(nn(C)c4c3n2)C(=O)N)c1             | 1.7782  | 1.5143 |
| 414  | CHEMBL1208963 | 534.03 | C[C@@H](Oc1cc(sc1C(=O)N)n2cnc3cc(ccc23)c4cnc(NCCO)c4)c5cccc5Cl                | 0.0000  | 0.7400 |
| 415  | CHEMBL1271694 | 534.49 | Cn1nc(C(=O)N)c2CCc3cnc(Nc4ccc(cc4OC(F)(F)F)[N+][O-])CC[N+](C)([O-])CC5)nc3c12 | 3.4285  | 1.4402 |
| 416* | CHEMBL1793892 | 534.51 | CN1CCN(CC1)c2ccc(OC(F)(F)F)c(Nc3ncc4CCc5c(nn(CCF)c5c4n3)C(=O)N)c2             | 0.6021  | 1.3012 |
| 417  | CHEMBL2042031 | 534.57 | CC(Oc1cc(ccc1C(=O)N)c2cc(cnc2N)c3ccc(CN(C)C)cc3)c4cccc4C(F)(F)F               | 3.1931  | 3.1587 |
| 418^ | CHEMBL2042032 | 534.57 | CC(Oc1cc(ccc1C(=O)N)c2cc(cnc2N)c3cccc(CN(C)C)c3)c4cccc4C(F)(F)F               | 3.5172  | 3.1583 |

|      |               |        |                                                                                                          |        |        |
|------|---------------|--------|----------------------------------------------------------------------------------------------------------|--------|--------|
| 419  | CHEMBL3218001 | 534.59 | <chem>Nc1cccc1NC(=O)\C=C\c2ccn(c2)S(=O)(=O)c3ccc4nnc(Nc5cccc(c5)C#C)c4c3</chem>                          | 4.4314 | 4.1865 |
| 420  | CHEMBL3408947 | 534.65 | <chem>COc1ccc2NC(=O)[C@@]3(C[C@H]3c4ccc5c(\C=C\c6ccc(CN7C[C@@H](C)O[C@@H](C)C7)cc6)n[nH]c5c4)c2c1</chem> | 4.6990 | 4.6941 |
| 421* | CHEMBL2042029 | 535.56 | <chem>CC(Oc1cc(ccc1C(=O)N)c2nc(cnc2N)c3ccc(CN(C)C)cc3)c4cccc4C(F)(F)F</chem>                             | 3.5911 | 3.1405 |
| 422* | CHEMBL2042030 | 535.56 | <chem>CC(Oc1cc(ccc1C(=O)N)c2nc(cnc2N)c3cccc(CN(C)C)c3)c4cccc4C(F)(F)F</chem>                             | 4.0828 | 3.1401 |
| 423  | CHEMBL1808337 | 536.55 | <chem>CCc1cccc(CC)c1NC(=O)c2nn(C)c3c2CCc4cnc(Nc5ccccc5OC(F)(F)F)nc34</chem>                              | 4.0000 | 4.3329 |
| 424  | CHEMBL2046883 | 537.66 | <chem>Cc1ccc(NC(=O)Nc2nnc(Sc3ncnc4cc(OC(C)C)CC5)ccc34)s2)cc1</chem>                                      | 4.0000 | 3.6746 |
| 425  | CHEMBL1689164 | 538.56 | <chem>CC(Oc1cc(ccc1C(=O)N)n2cnc3ccc(OC4CCN(C)CC4)cc23)c5cccc5C(F)(F)F</chem>                             | 2.2788 | 3.1640 |
| 426  | CHEMBL1615277 | 538.56 | <chem>C[C@@H](Oc1cc(ccc1C(=O)N)n2cnc3cc(OC4CCN(C)CC4)ccc23)c5cccc5C(F)(F)F</chem>                        | 4.7101 | 3.1666 |
| 427* | CHEMBL1689165 | 538.56 | <chem>CC(Oc1cc(ccc1C(=O)N)n2cnc3cc(OC4CCN(C)CC4)ccc23)c5cccc5C(F)(F)F</chem>                             | 4.9440 | 3.1666 |
| 428  | CHEMBL502835  | 539.62 | <chem>COC(=O)c1ccc2\C=C(\Nc3ccc(cc3)N(C)C(=O)CN4CCN(C)CC4)/c5cccc5)\C(=O)Nc2c1</chem>                    | 4.0000 | 3.6895 |
| 429^ | CHEMBL3217993 | 540.41 | <chem>Nc1cccc1NC(=O)c2ccc(COc3ccc4nnc(Nc5cccc(Br)c5)c4c3)cc2</chem>                                      | 5.0000 | 4.2655 |
| 430* | CHEMBL2042035 | 540.6  | <chem>CC(Oc1cc(ccc1C(=O)N)c2cc(cnc2N)c3ccc(CN(C)C)s3)c4cccc4C(F)(F)F</chem>                              | 2.6990 | 3.1705 |
| 431  | CHEMBL2042136 | 540.6  | <chem>C[C@@H](Oc1cc(ccc1C(=O)N)c2cc(cnc2N)c3cc(CN(C)C)cs3)c4cccc4C(F)(F)F</chem>                         | 2.9138 | 3.1705 |
| 432* | CHEMBL2042040 | 540.6  | <chem>CC(Oc1cc(ccc1C(=O)N)c2cc(cnc2N)c3cc(CN(C)C)cs3)c4cccc4C(F)(F)F</chem>                              | 3.1206 | 3.1705 |
| 433  | CHEMBL1630109 | 540.97 | <chem>ONC(=O)\C=C\c1cccc(c1)c2ccc3nnc(Nc4ccc(OCc5cccc(F)c5)c(Cl)c4)c3c2</chem>                           | 3.8325 | 4.0894 |
| 434* | CHEMBL1630110 | 540.97 | <chem>ONC(=O)\C=C\c1ccc(cc1)c2ccc3nnc(Nc4ccc(OCc5cccc(F)c5)c(Cl)c4)c3c2</chem>                           | 3.9590 | 4.0934 |
| 435^ | CHEMBL1964262 | 541.06 | <chem>C[C@@H](Oc1cc(sc1C(=O)N)n2cnc3ccc(OC[C@H](O)CN4CCCC4)cc23)c5cccc5C1</chem>                         | 0.4771 | 0.7358 |
| 436* | CHEMBL1208833 | 542.96 | <chem>C[C@@H](Oc1cc(sc1C(=O)N)n2cnc3cc(ccc23)c4cnc(Cl)c4)c5cccc5C(F)(F)F</chem>                          | 0.6021 | 0.4924 |
| 437  | CHEMBL1208834 | 542.96 | <chem>C[C@@H](Oc1cc(sc1C(=O)N)n2cnc3ccc(cc23)c4cnc(Cl)c4)c5cccc5C(F)(F)F</chem>                          | 1.7243 | 0.4898 |
| 438  | CHEMBL1933577 | 543.46 | <chem>CN1CCN(CC1)c2ccc(OC(F)(F)F)c(Nc3nccc(n3)c4cc(en4CC(F)(F)F)C(=O)N)c2</chem>                         | 1.2553 | 1.5280 |
| 439  | CHEMBL2392553 | 543.61 | <chem>COc1cc(ccc1Nc2ncc3N(C)C(=O)C(F)(F)CN(C4CCCC4)c3n2)C(=O)NC5CCN(C)C5</chem>                          | 0.6021 | 0.3744 |
| 440* | CHEMBL2392550 | 543.61 | <chem>COc1cc(Nc2ncc3N(C)C(=O)C(F)(F)CN(C4CCCC4)c3n2)ccc1C(=O)NC5CCN(C)C5</chem>                          | 1.1761 | 2.9320 |
| 441^ | CHEMBL1774336 | 544.53 | <chem>CN1CCC(CC1)C(=O)Nc2ccc(OC(F)(F)F)c(Nc3ncc4CCc5c(nn(C)c5c4n3)C(=O)N)c2</chem>                       | 2.3502 | 1.4943 |
| 442  | CHEMBL1615278 | 544.59 | <chem>C[C@@H](Oc1cc(sc1C(=O)N)n2cnc3ccc(OC4CCN(C)CC4)cc23)c5cccc5C(F)(F)F</chem>                         | 0.3010 | 0.4907 |
| 443^ | CHEMBL1689158 | 544.59 | <chem>CC(Oc1cc(sc1C(=O)N)n2cnc3ccc(OC4CCN(C)CC4)cc23)c5cccc5C(F)(F)F</chem>                              | 0.9542 | 0.4907 |
| 444  | CHEMBL1258913 | 544.67 | <chem>O=C(N[C@H](CN1CCCC1)c2cccc2)c3cc4[nH]nc(NC(=O)c5ccc(cc5)N6CCOCC6)c4s3</chem>                       | 4.0000 | 3.6366 |
| 445* | CHEMBL1774339 | 545.56 | <chem>CN1CCN(CC1)c2ccc(OC(F)(F)F)c(Nc3ncc4CCc5c(nn(C)CCN)c5c4n3)C(=O)N)c2</chem>                         | 1.7160 | 1.4828 |
| 446* | CHEMBL1793894 | 546.54 | <chem>COCCn1nc(C(=O)N)c2CCc3cnc(Nc4ccc(cc4OC(F)(F)F)N5CCN(C)CC5)nc3c12</chem>                            | 1.1761 | 1.4102 |
| 447* | CHEMBL1630108 | 547    | <chem>ONC(=O)\C=C\c1ccc(s1)c2ccc3nnc(Nc4ccc(OCc5cccc(F)c5)c(Cl)c4)c3c2</chem>                            | 3.4314 | 4.1177 |

|      |               |        |                                                                          |        |        |
|------|---------------|--------|--------------------------------------------------------------------------|--------|--------|
| 448^ | CHEMBL2392556 | 547.69 | COc1cc(ccc1Nc2ncc3N(C)C(=O)[C@@H](CC=C)CN(C4CCCC4)c3n2)C(=O)NC5CCN(C)CC5 | 0.0000 | 1.1616 |
| 449  | CHEMBL2392557 | 547.69 | COc1cc(ccc1Nc2ncc3N(C)C(=O)[C@H](CC=C)CN(C4CCCC4)c3n2)C(=O)NC5CCN(C)CC5  | 1.8451 | 1.1616 |
| 450  | CHEMBL1614725 | 547.96 | CC(C)(O)CC(=O)NCCn1ccc2ncnc(Nc3ccc(Oc4cccc(c4)C(F)(F)F)c(Cl)c3)c12       | 4.0000 | 4.5155 |
| 451* | CHEMBL1209017 | 549.09 | C[C@@H](Oc1cc(sc1C(=O)N)n2cnc3ccc(cc23)c4cnn(CCCN(C)C)c4)c5cccc5Cl       | 0.3010 | 0.7515 |
| 452* | CHEMBL1793895 | 550.96 | CN1CCN(CC1)c2ccc(OC(F)(F)F)c(Nc3ncc4CCc5c(nn(CCCl)c5c4n3)C(=O)N)c2       | 0.8451 | 1.5302 |
| 453* | CHEMBL2392558 | 551.66 | COc1cc(ccc1Nc2ncc3N(C)C(=O)[C@](F)(CN(C4CCCC4)c3n2)C=C)C(=O)NC5CCN(C)CC5 | 0.6990 | 1.6288 |
| 454^ | CHEMBL2392543 | 551.66 | COc1cc(ccc1Nc2ncc3N(C)C(=O)[C@](F)(CN(C4CCCC4)c3n2)C=C)C(=O)NC5CCN(C)CC5 | 2.2304 | 1.6288 |
| 455  | CHEMBL2392544 | 552.64 | COc1cc(ccc1Nc2ncc3N(C)C(=O)[C@](F)(CN(C4CCCC4)c3n2)C=C)C(=O)NN5CCN(C)CC5 | 0.4771 | 1.6247 |
| 456  | CHEMBL2392554 | 553.67 | CC[C@@]1(F)CN(C2CCCC2)c3nc(Nc4ccc(cc4OC)C(=O)NC5CCN(C)CC5)ncc3N(C)C1=O   | 0.3010 | 1.7207 |
| 457* | CHEMBL2392555 | 553.67 | CC[C@]1(F)CN(C2CCCC2)c3nc(Nc4ccc(cc4OC)C(=O)NC5CCN(C)CC5)ncc3N(C)C1=O    | 2.0000 | 1.7207 |
| 458  | CHEMBL1929238 | 554.53 | CN(C)CCN1CCN(CCC1=O)C(=O)c2cc(sc2NC(=O)Nc3cccc(Cl)c3Cl)C(C)(C)C          | 4.4771 | 4.5414 |
| 459  | CHEMBL1272250 | 556.58 | Cn1nc(C(=O)N)c2CCc3cnc(Nc4ccc(cc4OC(F)(F)F)N5CCC(CC5)N6CCCC6)nc3c12      | 1.5185 | 1.5186 |
| 460* | CHEMBL1794068 | 558.62 | C[C@@H](Oc1cc(sc1C(=O)N)n2cnc3ccc(OCC4CCN(C)CC4)cc23)c5cccc5C(F)(F)F     | 0.8451 | 0.4914 |
| 461* | CHEMBL1208894 | 559.08 | C[C@@H](Oc1cc(sc1C(=O)N)n2cnc3ccc(cc23)c4cnc(c4)N5CCNCC5)c6cccc6Cl       | 0.9031 | 0.7500 |
| 462* | CHEMBL1774333 | 559.59 | CN1CCN(CCCNc2ccc(OC(F)(F)F)c(Nc3ncc4CCc5c(nn(C)c5c4n3)C(=O)N)c2)CC1      | 2.0253 | 1.5137 |
| 463  | CHEMBL1834657 | 560.48 | CCN1CCN(CC1)c2ccc(Nc3cc(ncn3)N(C)C(=O)Nc4c(Cl)c(OC)cc(OC)c4Cl)cc2        | 4.0000 | 3.7751 |
| 464  | CHEMBL1983268 | 560.64 | CN1CCN(CC1)c2ccc(C(=O)Nc3n[nH]c4ccc(Cc5cc(F)cc(F)c5)cc34)c(NC6CCOCC6)c2  | 4.0000 | 3.7174 |
| 465  | CHEMBL1933581 | 561.56 | Cn1cc(cc1c2cnc(Nc3ccc(cc3OC(F)(F)F)N4CCN(CC4)C(=O)OC(C)(C)C)n2)C(=O)N    | 4.0000 | 2.9075 |
| 466^ | CHEMBL2392545 | 561.6  | COc1cc(C(=O)NC2CCN(C)CC2)c(F)cc1Nc3ncc4N(C)C(=O)C(F)(F)CN(C5CCCC5)c4n3   | 0.3010 | 0.3388 |
| 467* | CHEMBL2392547 | 561.6  | COc1c(F)c(ccc1Nc2ncc3N(C)C(=O)C(F)(F)CN(C4CCCC4)c3n2)C(=O)NC5CCN(C)CC5   | 1.4150 | 0.3388 |
| 468* | CHEMBL2392546 | 561.6  | COc1cc(cc(F)c1Nc2ncc3N(C)C(=O)C(F)(F)CN(C4CCCC4)c3n2)C(=O)NC5CCN(C)CC5   | 1.9085 | 0.3310 |
| 469  | CHEMBL2148053 | 562.47 | CC(C)(C(=O)NCCn2ccc3ncnc(Nc4ccc(Oc5cccc(Cl)c5)c(Cl)c4)c23)S(=O)(=O)C     | 4.0000 | 4.4105 |
| 470  | CHEMBL1933583 | 569.5  | CN1CCN(CC1)c2ccc(OC(F)(F)F)c(Nc3nccc(n3)c4cc5C(=O)NCCc5n4CC(F)(F)F)c2    | 1.4472 | 1.7330 |
| 471^ | CHEMBL220241  | 570.6  | CCn1c(nc2cnc(Oc3cccc(NC(=O)c4ccc(OCCN5CCOCC5)cc4)c3)cc12)c6nonc6N        | 4.0000 | 3.6570 |

|      |               |        |                                                                            |        |        |
|------|---------------|--------|----------------------------------------------------------------------------|--------|--------|
| 472  | CHEMBL1774329 | 572.63 | CN(C)CCCN1CCC(CC1)c2ccc(OC(F)(F)F)c(Nc3ncc4CCc5c(nn(C)c5c4n3)C(=O)N)c2     | 1.6232 | 1.5205 |
| 473  | CHEMBL1271482 | 572.63 | CN1C(C)(C)CC(CC1(C)C)Nc2ccc(OC(F)(F)F)c(Nc3ncc4CCc5c(nn(C)c5c4n3)C(=O)N)c2 | 2.9841 | 2.3922 |
| 474  | CHEMBL1684800 | 572.97 | COc1ccc(Cn2ncc(NC(=O)c3cc(NC(=O)Nc4ccc(Cl)c(c4)C(F)(F)F)ccc3C)c2N)cc1      | 2.2238 | 4.0150 |
| 475^ | CHEMBL1208958 | 573.11 | C[C@@H](Oc1cc(sc1C(=O)N)n2cnc3cc(ccc23)c4ccnc(c4)N5CCN(C)CC5)c6cccc6C1     | 0.3010 | 0.7503 |
| 476^ | CHEMBL1774340 | 573.61 | CN(C)CCCN1nc(C(=O)N)c2CCc3cnc(Nc4cc(ccc4OC(F)(F)F)N5CCN(C)CC5)nc3c12       | 2.4456 | 1.4935 |
| 477^ | CHEMBL1209015 | 577.1  | C[C@@H](Oc1cc(sc1C(=O)N)n2cnc3cc(ccc23)c4cnn(CCN5CCOCC5)c4)c6cccc6Cl       | 0.0000 | 0.7481 |
| 478* | CHEMBL2392549 | 578.05 | COc1cc(C(=O)NC2CCN(C)CC2)c(Cl)cc1Nc3ncc4N(C)C(=O)C(F)(F)CN(C5CCCC5)c4n3    | 0.0000 | 0.3773 |
| 479  | CHEMBL2443026 | 578.66 | CN(C)c1ccc(Oc2cc(O)cc(O)c2c3onc(c3)C(=O)NC4CCN(CC4)C5CCC6(CC5)OCCO6)cc1    | 1.0000 | 2.0062 |
| 480^ | CHEMBL1808339 | 579.57 | CCc1cccc(CC)c1NC(=O)c2nn(C)c3c2CCc4cnc(Nc5ccc(cc5OC(F)(F)F)C(=O)N)nc34     | 4.0000 | 2.9203 |
| 481* | CHEMBL1630111 | 580.01 | Nc1cccc1NC(=O)c2oc(cc2)c3ccc4nenc(Nc5ccc(OCc6cccc(F)c6)c(Cl)c5)c4c3        | 3.5911 | 4.1820 |
| 482  | CHEMBL554     | 581.06 | CS(=O)(=O)CCNCc1oc(cc1)c2ccc3nenc(Nc4ccc(OCc5cccc(F)c5)c(Cl)c4)c3c2        | 5.0000 | 3.8697 |
| 483  | CHEMBL1208964 | 587.13 | C[C@@H](Oc1cc(sc1C(=O)N)n2cnc3cc(ccc23)c4ccnc(NC5CCN(C)CC5)c4)c6cccc6Cl    | 0.0000 | 0.7499 |
| 484* | CHEMBL1208965 | 587.13 | C[C@@H](Oc1cc(sc1C(=O)N)n2cnc3cc(ccc23)c4ccc(NC5CCN(C)CC5)nc4)c6cccc6Cl    | 0.3010 | 0.7495 |
| 485^ | CHEMBL1090360 | 587.69 | O=C(Cc1cccc1)Nc2cccc(c2)c3nc4scn4c3c5cnc(Nc6cccc(c6)N7CCOCC7)n5            | 3.0000 | 3.8000 |
| 486* | CHEMBL1208966 | 588.12 | C[C@@H](Oc1cc(sc1C(=O)N)n2cnc3cc(ccc23)c4ccnc(NC5CCN(C)CC5)n4)c6cccc6Cl    | 0.0000 | 0.7431 |
| 487^ | CHEMBL1269487 | 588.58 | Cn1nc(C(=O)N)c2CCc3cnc(Nc4cc(ccc4OC(F)(F)F)N5CCN(CC5)C(=O)OC(C)(C)C)nc3c12 | 2.9340 | 2.3458 |
| 488^ | CHEMBL1933580 | 589.61 | CN1CCN(CC1)c2ccc(OC(F)(F)F)c(Nc3nccc(n3)c4cc(cn4CCOC5CCCCO5)C(=O)N)c2      | 2.4346 | 1.9228 |
| 489  | CHEMBL1209016 | 590.14 | C[C@@H](Oc1cc(sc1C(=O)N)n2cnc3cc(ccc23)c4cnn(CCN5CCN(C)CC5)c4)c6cccc6Cl    | 0.0000 | 0.7510 |
| 490  | CHEMBL1208960 | 593.62 | C[C@@H](Oc1cc(sc1C(=O)N)n2cnc3cc(ccc23)c4ccnc(c4)N5CCOCC5)c6cccc6C(F)(F)F  | 0.6990 | 0.4835 |
| 491^ | CHEMBL1269490 | 594.59 | COc1ccc(Cn2nc(C(=O)N)c3CCc4cnc(Nc5cc(ccc5OC(F)(F)F)N6CCNCC6)nc4c23)c1      | 3.4232 | 1.4714 |
| 492* | CHEMBL1208961 | 594.65 | C[C@@H](Oc1cc(sc1C(=O)N)n2cnc3cc(ccc23)c4ccnc(NCCN(C)C)c4)c5cccc5C(F)(F)F  | 0.4771 | 0.4845 |
| 493  | CHEMBL1630112 | 596.07 | Nc1cccc1NC(=O)c2ccc(s2)c3ccc4nenc(Nc5ccc(OCc6cccc(F)c6)c(Cl)c5)c4c3        | 3.7482 | 4.3293 |



|      |               |        |                                                                                                                        |         |        |
|------|---------------|--------|------------------------------------------------------------------------------------------------------------------------|---------|--------|
| 494  | CHEMBL1208962 | 596.12 | C[C@@H](Oc1cc(sc1C(=O)N)n2cnc3cc(ccc23)c4ccnc(NCCS(=O)(=O)C)c4)c5ccccc5Cl                                              | 0.0000  | 0.7301 |
| 495* | CHEMBL1808341 | 596.72 | CCc1cccc(CC)c1NC(=O)c2nn(C)c3c2CCc4cnc(Nc5ccc(cc5OC)C(=O)NCCN(C)C)n c34                                                | 3.2180  | 3.2671 |
| 496  | CHEMBL1269488 | 600.6  | Cn1nc(C(=O)N)c2CCc3cnc(Nc4cc(ccc4OC(F)(F)F)N5CCN(CC5)C(=O)N6CCNCC 6)nc3c12                                             | 1.5441  | 1.4818 |
| 497  | CHEMBL1933585 | 601.62 | CN1CCN(CC1)c2ccc(OC(F)(F)F)c(Nc3nccc(n3)c4cc5C(=O)N(CCc5n4C)C(=O)OC( C)(C)C)c2                                         | 2.9122  | 2.8006 |
| 498  | CHEMBL1630113 | 606.05 | Nc1ccccc1NC(=O)\C=C\c2oc(cc2)c3ccc4ncnc(Nc5ccc(OCc6cccc(F)c6)c(Cl)c5)c4c3                                              | 3.9294  | 4.2188 |
| 499  | CHEMBL1208959 | 606.66 | C[C@@H](Oc1cc(sc1C(=O)N)n2cnc3cc(ccc23)c4ccnc(c4)N5CCN(C)CC5)c6cccc6C (F)(F)F                                          | 0.4771  | 0.4872 |
| 500^ | CHEMBL1630114 | 616.08 | Nc1ccccc1NC(=O)\C=C\c2cccc(c2)c3ccc4ncnc(Nc5ccc(OCc6cccc(F)c6)c(Cl)c5)c4c 3                                            | 3.7404  | 4.2435 |
| 501  | CHEMBL1630115 | 616.08 | Nc1ccccc1NC(=O)\C=C\c2ccc(cc2)c3ccc4ncnc(Nc5ccc(OCc6cccc(F)c6)c(Cl)c5)c4c 3                                            | 3.7924  | 4.2474 |
| 502  | CHEMBL1774338 | 616.63 | CN1CCN(CC1)c2ccc(OC(F)(F)F)c(Nc3ncc4CCc5c(nn(CCOC6CCOCC6)c5c4n3)C( =O)N)c2                                             | 1.6335  | 1.3941 |
| 503  | CHEMBL1630116 | 618.1  | Nc1ccccc1NC(=O)CCc2ccc(cc2)c3ccc4ncnc(Nc5ccc(OCc6cccc(F)c6)c(Cl)c5)c4c3                                                | 4.4314  | 3.7572 |
| 504* | CHEMBL1209018 | 618.19 | CCN1CCN(CCCn2cc(cn2)c3ccc4c(c3)ncn4c5cc(O[C@H](C)c6cccc6Cl)c(s5)C(=O) N)CC1                                            | 0.0000  | 0.7519 |
| 505  | CHEMBL1233528 | 618.81 | CC[C@H]1N(C(C)C)c2nc(Nc3ccc(cc3OC)C(=O)N[C@@H]4CC[C@H](CC4)N5CC N(CC6CC6)CC5)ncc2N(C)C1=O                              | -0.0605 | 1.1124 |
| 506  | CHEMBL1808340 | 622.76 | CCc1cccc(CC)c1NC(=O)c2nn(C)c3c2CCc4cnc(Nc5ccc(cc5OC)C(=O)NC6CCN(C) CC6)nc34                                            | 2.3747  | 3.2691 |
| 507^ | CHEMBL1807305 | 622.76 | CCc1cccc(CC)c1NC(=O)c2nn(C)c3c2CCc4cnc(Nc5ccc(cc5OC)C(=O)N6CCCN(C) CC6)nc34                                            | 4.0000  | 3.2697 |
| 508* | CHEMBL1807303 | 636.79 | CCc1cccc(CC)c1NC(=O)c2nn(C)c3c2CCc4cnc(Nc5ccc(cc5OC)C(=O)N6CCC(CC6) N(C)C)nc34                                         | 4.0000  | 3.2698 |
| 509* | CHEMBL1808342 | 650.69 | CCc1cccc(CC)c1NC(=O)c2nn(C)c3c2CCc4cnc(Nc5ccc(cc5OC(F)(F)F)C(=O)NCCN (C)C)nc34                                         | 4.0000  | 3.0916 |
| 510^ | CHEMBL1807301 | 662.82 | CCc1cccc(CC)c1NC(=O)c2nn(C)c3c2CCc4cnc(Nc5ccc(cc5OC)C(=O)N6CCC[C@H ]6CN7CCCC7)nc34                                     | 4.0000  | 3.2715 |
| 511* | CHEMBL1808343 | 662.82 | CCc1cccc(CC)c1NC(=O)c2nn(C)c3c2CCc4cnc(Nc5ccc(cc5OC)C(=O)N6CCC[C@@ H]6CN7CCCC7)nc34                                    | 4.0000  | 3.2715 |
| 512  | CHEMBL2207846 | 674.64 | CC(C)C[C@H](NC(=O)[C@@H]1CCCN1C(=O)C)C(=O)N[C@@H](Cc2cnc[nH]2)C (=O)N[C@@H](CO)C(=O)N[C@@H]([C@@H](C)OP(=O)(O)O)C(=O)N | 4.2041  | 2.9083 |

|      |               |        |                                                                                                                                            |        |        |
|------|---------------|--------|--------------------------------------------------------------------------------------------------------------------------------------------|--------|--------|
| 513^ | CHEMBL2323729 | 675.63 | CC(C)C[C@H](NC(=O)[C@@H]1CCCN1C(=O)C)C(=O)N[C@@H](Cc2cnc[nH]2)C(=O)N[C@@H](CO)C(=O)N[C@@H]([C@@H](C)OP(=O)(O)O)C(=O)O                      | 3.7218 | 2.6336 |
| 514  | CHEMBL1807306 | 676.73 | CCc1cccc(CC)c1NC(=O)c2nn(C)c3c2CCc4cnc(Nc5ccc(cc5OC(F)(F)F)C(=O)N6CCCN(C)CC6)nc34                                                          | 4.0000 | 3.1706 |
| 515^ | CHEMBL1236095 | 676.73 | CCc1cccc(CC)c1NC(=O)c2nn(C)c3c2CCc4cnc(Nc5ccc(cc5OC(F)(F)F)C(=O)N6CCCN(C)CC6)nc34                                                          | 4.0000 | 3.1188 |
| 516* | CHEMBL1807304 | 690.76 | CCc1cccc(CC)c1NC(=O)c2nn(C)c3c2CCc4cnc(Nc5ccc(cc5OC(F)(F)F)C(=O)N6CC(C)N(C)C)nc34                                                          | 4.0000 | 3.1738 |
| 517  | CHEMBL1807300 | 716.8  | CCc1cccc(CC)c1NC(=O)c2nn(C)c3c2CCc4cnc(Nc5ccc(cc5OC(F)(F)F)C(=O)N6CC[C@@H]6CN7CCCC7)nc34                                                   | 4.0000 | 3.1927 |
| 518^ | CHEMBL1807302 | 716.8  | CCc1cccc(CC)c1NC(=O)c2nn(C)c3c2CCc4cnc(Nc5ccc(cc5OC(F)(F)F)C(=O)N6CC[C@H]6CN7CCCC7)nc34                                                    | 4.0000 | 3.1927 |
| 519  | CHEMBL1269489 | 730.78 | CN1CCN(CC1)c2ccc(OC(F)(F)F)c(Nc3ncc4CCc5c(nn(c5c4n3)C(c6cccc6)(c7cccc7)c8cccc8)C(=O)N)c2                                                   | 4.0000 | 2.2971 |
| 520* | CHEMBL2380765 | 776.75 | CC(C)C[C@@H]1NC(=O)[C@@H]2CCCN2C(=O)CSC[C@H](NC(=O)[C@@H](NC(=O)[C@H](CO)NC(=O)[C@H](Cc3cnc[nH]3)NC1=O)[C@@H](C)OP(=O)(O)O)C(=O)O          | 3.9912 | 2.7162 |
| 521  | CHEMBL2207841 | 839.91 | CC(C)C[C@H](NC(=O)[C@@H]1CCCN1C(=O)C)C(=O)N[C@@H](CCC(=O)NCCC(C)C)C(=O)N[C@@H](CO)C(=O)N[C@@H]([C@@H](C)OP(=O)(O)O)C(=O)N                  | 2.1461 | 2.9001 |
| 522* | CHEMBL2207839 | 839.91 | CC(C)C[C@H](NC(=O)[C@@H]1CCCN1C(=O)C)C(=O)N[C@@H](CCCCNC(=O)CCCCC)C(=O)N[C@@H](CO)C(=O)N[C@@H]([C@@H](C)OP(=O)(O)O)C(=O)N                  | 2.8129 | 2.9150 |
| 523^ | CHEMBL2207842 | 839.91 | CC(C)C[C@H](NC(=O)[C@@H]1CCCN1C(=O)C)C(=O)N[C@@H](CC(=O)NCCC(C)C)C(=O)N[C@@H](CO)C(=O)N[C@@H]([C@@H](C)OP(=O)(O)O)C(=O)N                   | 3.0414 | 2.8873 |
| 524  | CHEMBL2207840 | 853.94 | CC(C)C[C@H](NC(=O)[C@@H]1CCCN1C(=O)C)C(=O)N[C@@H](CCCCNC(=O)CCCCC)C(=O)N[C@@H](CO)C(=O)N[C@@H]([C@@H](C)OP(=O)(O)O)C(=O)N                  | 2.2304 | 2.9118 |
| 525* | CHEMBL2207845 | 862.95 | CC(C)C[C@H](NC(=O)[C@@H]1CCCN1C(=O)C)C(=O)N[C@@H](Cc2cncn2CCCC(C)C)C(=O)N[C@@H](CO)C(=O)N[C@@H]([C@@H](C)OP(=O)(O)O)C(=O)N                 | 0.7482 | 2.9072 |
| 526  | CHEMBL2207844 | 862.95 | CC(C)C[C@H](NC(=O)[C@@H]1CCCN1C(=O)C)C(=O)N[C@@H](Cc2cm(C)C(C)C)C(=O)N[C@@H](CO)C(=O)N[C@@H]([C@@H](C)OP(=O)(O)O)C(=O)N                    | 2.5051 | 2.9058 |
| 527^ | CHEMBL2380653 | 878.89 | CC(C)C[C@@H]1NC(=O)CN(CCc2c[nH]c3cccc23)C(=O)CSC[C@H](NC(=O)[C@@H](NC(=O)[C@H](CO)NC(=O)[C@H](Cc4c[nH]cn4)NC1=O)[C@@H](C)OP(=O)(O)O)C(=O)N | 3.9294 | 2.8421 |

|     |               |        |                                                                                                                                                                  |        |        |
|-----|---------------|--------|------------------------------------------------------------------------------------------------------------------------------------------------------------------|--------|--------|
| 528 | CHEMBL2207843 | 912.02 | <chem>CC(C)C[C@H](NC(=O)[C@@H]1CCCN1C(=O)C(=O)N[C@@H](Cc2cn(CCCCCC3C3C3C3C3C3)C4CCCCC24)C(=O)N[C@@H](CO)C(=O)N[C@@H]([C@@H](C)OP(=O)(O)O)C(=O)N</chem>           | 3.9685 | 2.9063 |
| 529 | CHEMBL505637  | 942.24 | <chem>O\N=C(\Cc1cc(Br)c(O)c(c1)c2cc(C\C(=N\O)\C(=O)NCCc3ccc(O)c(Br)c3)cc(Br)c2O)/C(=O)NCCc4ccc(O)c(Br)c4</chem>                                                  | 3.5911 | 3.5256 |
| 530 | CHEMBL2380651 | 949.97 | <chem>CC(C)C[C@@H]1NC(=O)CN(CCC(=O)NCCc2c[nH]c3cccc23)C(=O)CSC[C@@H](NC(=O)[C@@H](NC(=O)[C@H](CO)NC(=O)[C@H](Cc4c[nH]cn4)NC1=O)[C@@H](C)OP(=O)(O)O)C(=O)N</chem> | 3.6767 | 2.8256 |

<sup>a</sup> validation set compound <sup>b</sup> test set compound

**Table 2S.** List of mathematical equations used in the present study.

$$S = \sqrt{\frac{\sum_{i=1}^N (p_i^{exp} - p_i^{pred})^2}{N - d - 1}}$$

$$h_i = x_i (\mathbf{X}^T \mathbf{X})^{-1} x_i^T$$

$$h^* = 3(d + 1) / N_{train}$$

$$k = \frac{\sum_{i=1}^{N_{test}} (p_i^{exp} p_i^{pred})^2}{\sum_{i=1}^{N_{test}} (p_i^{pred})^2}$$

$$k' = \frac{\sum_{i=1}^{N_{test}} (p_i^{exp} p_i^{pred})^2}{\sum_{i=1}^{N_{test}} (p_i^{exp})^2}$$

$$p_0^{exp} = k p^{pred}$$

$$p_0^{pred} = k' p^{exp}$$

$$R_0^2 = 1 - \frac{\sum_{i=1}^{N_{test}} (p_i^{exp} - p_{0i}^{exp})^2}{\sum_{i=1}^{N_{test}} (p_i^{exp} - p_{av}^{exp})^2}$$

$$R_0'^2 = 1 - \frac{\sum_{i=1}^{N_{test}} (p_i^{pred} - p_{0i}^{pred})^2}{\sum_{i=1}^{N_{test}} (p_i^{pred} - p_{av}^{pred})^2}$$

$$R_m^2 = R_{test}^2 \left( 1 - \left| \sqrt{R_{test}^2 - R_0^2} \right| \right)$$

$$VIF = \frac{1}{1 - R_j^2}$$

$S$ : standard deviation;  $N$ : number of molecules;  $p_i^{exp}$ : experimental activity for compound  $i$ ;  $p_i^{pred}$ : predicted activity for compound  $i$ ;  $d$ : number of descriptors;  $h_i$ : leverage for compound  $i$ ;  $x_i$ : descriptor vector for  $i$ ;  $\mathbf{X}$ : model matrix for

the training set (train);  $N_{train}$  : number of molecules in train;  $N_{test}$  =number of molecules in test;  $h^*$  : warning leverage;  $p_{0i}^{exp}$  and  $p_{0i}^{pred}$  : calculated activities for  $i$  in test set in regressions through the origin of  $p^{exp}$  against  $p^{pred}$  and  $p^{pred}$  against  $p^{exp}$ , respectively;  $R_0^2$  and  $R_0'^2$  : squared correlation coefficients for regressions through the origin in test set of  $p^{exp}$  against  $p^{pred}$  and  $p^{pred}$  against  $p^{exp}$ , respectively;  $p_{av}^{pred}$  : average value for  $p^{pred}$  in test set;  $p_{av}^{exp}$  : average value for  $p^{exp}$  in test set;  $R_m^2$  : modified squared correlation coefficient;  $R_{test}^2$  : squared correlation coefficient between observed and predicted values for the test set;  $VIF$ : variance inflation factor;  $R_j^2$  is the squared correlation coefficient when the  $j^{th}$  variable is regressed against all the other variables in the model.

**Table 3S.** A brief description for molecular descriptors appearing in this QSAR study.

| descriptor class                   | symbol    | description                                                                                                                                                                                                                                                                                                                                              |
|------------------------------------|-----------|----------------------------------------------------------------------------------------------------------------------------------------------------------------------------------------------------------------------------------------------------------------------------------------------------------------------------------------------------------|
| 2D Atom Pairs Fingerprint          | AP159     | presence of C-O at topological distance 3                                                                                                                                                                                                                                                                                                                |
|                                    | AP170     | presence of N-O at topological distance 3                                                                                                                                                                                                                                                                                                                |
|                                    | APC510    | count of S-X at topological distance 7                                                                                                                                                                                                                                                                                                                   |
| Klekota Roth Fingerprint           | KR3577    | presence of SMARTS substructure <chem>Cc1cccc(C)c1NC=O</chem>                                                                                                                                                                                                                                                                                            |
|                                    | KRC3897   | number of SMARTS substructures <chem>CN(C)CCCNC=O</chem>                                                                                                                                                                                                                                                                                                 |
|                                    | KR4261    | presence of SMARTS substructure <chem>NC1CCCC1</chem>                                                                                                                                                                                                                                                                                                    |
|                                    | KR4268    | presence of SMARTS substructure <chem>Nc1cccc1O</chem>                                                                                                                                                                                                                                                                                                   |
| Pubchem Fingerprint                | PC494     | presence of <chem>O=C-C:N</chem> <sup>a</sup>                                                                                                                                                                                                                                                                                                            |
|                                    | PC534     | presence of <chem>S-C:C-O</chem>                                                                                                                                                                                                                                                                                                                         |
|                                    | PC686     | presence of <chem>O=C-C-C-C-O</chem>                                                                                                                                                                                                                                                                                                                     |
| Substructure Fingerprint           | Sub99     | presence of primary amides                                                                                                                                                                                                                                                                                                                               |
| Hydrogen Bond Acceptor Count       | nHBAcc3   | number of H bond acceptors (any O; any N where the formal charge of the N is non-positive (i.e. formal charge <= 0) except a non-aromatic N that is adjacent to an O and aromatic ring, or an aromatic N with a H atom in a ring, or an aromatic N with 3 neighboring atoms in a ring, or a N with total bond order >=4, or a N in an amide bond; any F) |
| Electrotopological State Atom Type | maxHCsats | maximum atom-type H E-State: H bonded to B, Si, P, Ge, As, Se, Sn or Pb                                                                                                                                                                                                                                                                                  |
|                                    | mindssC   | minimum atom-type E-State: =C<                                                                                                                                                                                                                                                                                                                           |
| MACCS Fingerprint                  | M66       | number of <chem>CC(C)(C)A</chem> <sup>b</sup>                                                                                                                                                                                                                                                                                                            |

<sup>a</sup> denotes bond aromaticity <sup>b</sup> A: any valid periodic table element symbol

**Table 4S.** Squared correlation matrix for Eq. 1 and the variance inflation factor (VIF) for each descriptor.

|                  | <i>mindssC</i> | <i>maxHCsats</i> | <i>M66</i> | <i>PC494</i> | <i>PC534</i> | <i>PC686</i> | <i>KR3577</i> | <i>KR4268</i> | VIF   |
|------------------|----------------|------------------|------------|--------------|--------------|--------------|---------------|---------------|-------|
| <i>mindssC</i>   | 1              | 0.04             | 0.03       | 0.01         | 0.01         | 0.00         | 0.00          | 0.04          | 1.018 |
| <i>maxHCsats</i> |                | 1                | 0.02       | 0.04         | 0.06         | 0.00         | 0.01          | 0.05          | 1.040 |
| <i>M66</i>       |                |                  | 1          | 0.00         | 0.01         | 0.01         | 0.00          | 0.02          | 1.012 |
| <i>PC494</i>     |                |                  |            | 1            | 0.03         | 0.00         | 0.07          | 0.14          | 1.049 |
| <i>PC534</i>     |                |                  |            |              | 1            | 0.01         | 0.00          | 0.02          | 1.024 |
| <i>PC686</i>     |                |                  |            |              |              | 1            | 0.06          | 0.04          | 1.010 |
| <i>KR3577</i>    |                |                  |            |              |              |              | 1             | 0.13          | 1.046 |
| <i>KR4268</i>    |                |                  |            |              |              |              |               | 1             | 1.107 |

**Table 5S.** Numerical descriptor values involved in Eq. 1.

| ID | <i>mindssC</i> | <i>maxHCsats</i> | <i>M66</i> | <i>PC494</i> | <i>PC534</i> | <i>PC686</i> | <i>KR3577</i> | <i>KR4268</i> |
|----|----------------|------------------|------------|--------------|--------------|--------------|---------------|---------------|
| 1  | -0.04324074    | 0.48743056       | 0          | 0            | 0            | 0            | 0             | 0             |
| 2  | -0.68435185    | 0.00000000       | 0          | 0            | 0            | 1            | 0             | 0             |
| 3  | -0.48654809    | 0.00000000       | 0          | 0            | 0            | 0            | 0             | 0             |
| 4  | 0.00000000     | 0.00000000       | 0          | 0            | 0            | 1            | 0             | 0             |
| 5  | 0.01185752     | 0.55977584       | 0          | 0            | 0            | 0            | 0             | 0             |
| 6  | -0.79375000    | 0.00000000       | 0          | 0            | 0            | 1            | 0             | 0             |
| 7  | -0.04557587    | 0.57615276       | 0          | 0            | 0            | 0            | 0             | 0             |
| 8  | -0.09326389    | 0.00000000       | 0          | 0            | 0            | 0            | 0             | 0             |
| 9  | -0.11153439    | 0.00000000       | 0          | 0            | 0            | 0            | 0             | 0             |
| 10 | -0.13939531    | 0.00000000       | 0          | 0            | 0            | 0            | 0             | 0             |
| 11 | 1.00310185     | 0.60027778       | 0          | 0            | 0            | 0            | 0             | 0             |
| 12 | -0.02823507    | 0.00000000       | 0          | 0            | 0            | 0            | 0             | 0             |
| 13 | -0.06823507    | 0.00000000       | 0          | 0            | 0            | 0            | 0             | 0             |
| 14 | -0.08864324    | 0.00000000       | 0          | 0            | 0            | 0            | 0             | 0             |
| 15 | 1.01060185     | 0.60027778       | 0          | 0            | 0            | 0            | 0             | 0             |
| 16 | 1.00717593     | 0.60027778       | 0          | 0            | 0            | 0            | 0             | 0             |
| 17 | -0.19151408    | 0.00000000       | 0          | 0            | 0            | 0            | 0             | 0             |
| 18 | 0.96474206     | 0.61315760       | 0          | 0            | 0            | 0            | 0             | 0             |
| 19 | -0.39699074    | 0.00000000       | 0          | 0            | 0            | 0            | 0             | 0             |
| 20 | -0.05695318    | 0.00000000       | 0          | 0            | 0            | 0            | 0             | 0             |
| 21 | -0.05934477    | 0.00000000       | 0          | 0            | 0            | 0            | 0             | 0             |
| 22 | -0.07496977    | 0.00000000       | 0          | 0            | 0            | 0            | 0             | 0             |
| 23 | -0.84145571    | 0.00000000       | 0          | 1            | 0            | 0            | 0             | 0             |
| 24 | 0.00000000     | 0.00000000       | 0          | 0            | 0            | 0            | 0             | 0             |
| 25 | -0.35671937    | 0.00000000       | 0          | 0            | 1            | 0            | 0             | 0             |
| 26 | 1.03677469     | 0.59959191       | 0          | 0            | 0            | 0            | 0             | 0             |
| 27 | 1.02535151     | 0.59977387       | 0          | 0            | 0            | 0            | 0             | 0             |
| 28 | -0.54949074    | 0.00000000       | 0          | 0            | 0            | 1            | 0             | 0             |
| 29 | -0.22193736    | 0.00000000       | 0          | 0            | 0            | 0            | 0             | 0             |
| 30 | -0.22193736    | 0.00000000       | 0          | 0            | 0            | 0            | 0             | 0             |
| 31 | -0.50149896    | 0.00000000       | 0          | 0            | 0            | 0            | 0             | 0             |

|    |             |            |   |   |   |   |   |   |
|----|-------------|------------|---|---|---|---|---|---|
| 32 | 0.01990741  | 0.56704436 | 0 | 0 | 0 | 0 | 0 | 0 |
| 33 | -0.07263039 | 0.00000000 | 0 | 0 | 0 | 0 | 0 | 0 |
| 34 | -0.09303855 | 0.00000000 | 0 | 0 | 0 | 0 | 0 | 0 |
| 35 | -0.93149749 | 0.69421485 | 0 | 0 | 0 | 0 | 0 | 0 |
| 36 | 0.98699172  | 0.61277179 | 0 | 0 | 0 | 0 | 0 | 0 |
| 37 | 0.99841490  | 0.61265369 | 0 | 0 | 0 | 0 | 0 | 0 |
| 38 | -0.94149749 | 0.69421485 | 0 | 0 | 0 | 0 | 0 | 0 |
| 39 | -0.10374008 | 0.00000000 | 0 | 0 | 0 | 0 | 0 | 0 |
| 40 | -0.61013104 | 0.00000000 | 0 | 0 | 0 | 0 | 0 | 0 |
| 41 | -0.63053920 | 0.00000000 | 0 | 0 | 0 | 0 | 0 | 0 |
| 42 | -0.62575604 | 0.00000000 | 0 | 0 | 0 | 0 | 0 | 0 |
| 43 | -0.03709511 | 0.00000000 | 0 | 0 | 0 | 0 | 0 | 0 |
| 44 | -0.03709511 | 0.00000000 | 0 | 0 | 0 | 0 | 0 | 0 |
| 45 | 0.00000000  | 0.00000000 | 0 | 0 | 0 | 0 | 0 | 0 |
| 46 | 0.00000000  | 0.00000000 | 0 | 0 | 0 | 0 | 0 | 0 |
| 47 | 0.00000000  | 0.00000000 | 0 | 0 | 0 | 0 | 0 | 0 |
| 48 | -0.94088057 | 0.00000000 | 0 | 0 | 0 | 1 | 0 | 0 |
| 49 | -0.88767149 | 0.00000000 | 0 | 0 | 0 | 0 | 0 | 0 |
| 50 | -0.05225134 | 0.00000000 | 0 | 0 | 0 | 0 | 0 | 0 |
| 51 | -0.83285346 | 0.68161033 | 0 | 0 | 0 | 0 | 0 | 0 |
| 52 | -0.93012008 | 0.69421485 | 0 | 0 | 0 | 0 | 0 | 0 |
| 53 | -0.84111792 | 0.68161033 | 0 | 0 | 0 | 0 | 0 | 0 |
| 54 | 1.16410777  | 0.58263590 | 0 | 0 | 0 | 0 | 0 | 0 |
| 55 | -0.52533320 | 0.63512706 | 0 | 1 | 0 | 0 | 0 | 0 |
| 56 | -1.04511217 | 0.00000000 | 0 | 1 | 0 | 0 | 0 | 0 |
| 57 | -0.61764214 | 0.55247629 | 0 | 0 | 0 | 0 | 0 | 0 |
| 58 | 0.00000000  | 0.00000000 | 0 | 0 | 0 | 0 | 0 | 0 |
| 59 | 0.00000000  | 0.66577389 | 0 | 1 | 0 | 0 | 0 | 0 |
| 60 | 0.00000000  | 0.00000000 | 0 | 0 | 0 | 0 | 0 | 0 |
| 61 | -0.05181133 | 0.00000000 | 0 | 0 | 0 | 0 | 0 | 0 |
| 62 | -0.83169605 | 0.68161033 | 0 | 0 | 0 | 0 | 0 | 0 |
| 63 | -0.78157478 | 0.67303607 | 0 | 0 | 0 | 0 | 0 | 0 |
| 64 | 0.00000000  | 0.00000000 | 0 | 0 | 0 | 0 | 0 | 0 |
| 65 | 0.00000000  | 0.00000000 | 0 | 0 | 0 | 0 | 0 | 0 |
| 66 | -0.93656713 | 0.70810374 | 0 | 0 | 0 | 0 | 0 | 0 |
| 67 | -0.15770125 | 0.00000000 | 0 | 0 | 0 | 0 | 0 | 0 |
| 68 | -0.15770125 | 0.00000000 | 0 | 0 | 0 | 0 | 0 | 0 |
| 69 | -0.09146944 | 0.00000000 | 0 | 0 | 0 | 0 | 0 | 1 |
| 70 | -0.08473067 | 0.00000000 | 0 | 0 | 0 | 0 | 0 | 0 |
| 71 | -0.18483472 | 0.00000000 | 0 | 0 | 0 | 0 | 0 | 0 |
| 72 | -0.07958911 | 0.00000000 | 0 | 0 | 0 | 0 | 0 | 0 |
| 73 | -0.84558494 | 0.70938811 | 0 | 0 | 0 | 0 | 0 | 0 |
| 74 | -0.11250845 | 0.00000000 | 0 | 0 | 0 | 0 | 0 | 0 |
| 75 | -0.10736689 | 0.00000000 | 0 | 0 | 0 | 0 | 0 | 0 |
| 76 | -0.11958911 | 0.00000000 | 0 | 0 | 0 | 0 | 0 | 0 |
| 77 | -0.12473067 | 0.00000000 | 0 | 0 | 0 | 0 | 0 | 0 |
| 78 | -0.50741653 | 0.63512706 | 0 | 1 | 0 | 0 | 0 | 0 |
| 79 | -0.53262759 | 0.52579398 | 0 | 0 | 0 | 0 | 0 | 0 |
| 80 | -1.00741653 | 0.65512706 | 0 | 1 | 0 | 0 | 0 | 0 |
| 81 | -0.40078572 | 0.00000000 | 0 | 0 | 0 | 0 | 0 | 0 |
| 82 | 0.00000000  | 0.65705282 | 0 | 1 | 0 | 0 | 0 | 0 |

|     |             |            |   |   |   |   |   |   |
|-----|-------------|------------|---|---|---|---|---|---|
| 83  | -0.43420512 | 0.00000000 | 0 | 0 | 0 | 0 | 0 | 0 |
| 84  | -0.44983012 | 0.00000000 | 0 | 0 | 0 | 0 | 0 | 0 |
| 85  | -0.45461328 | 0.00000000 | 0 | 0 | 0 | 0 | 0 | 0 |
| 86  | -0.62710397 | 0.00000000 | 0 | 0 | 0 | 0 | 0 | 0 |
| 87  | -0.43663465 | 0.72606392 | 0 | 0 | 0 | 1 | 0 | 0 |
| 88  | -0.03908429 | 0.00000000 | 0 | 0 | 0 | 0 | 0 | 0 |
| 89  | 0.05946145  | 0.00000000 | 0 | 0 | 0 | 0 | 0 | 0 |
| 90  | -0.07908429 | 0.00000000 | 0 | 0 | 0 | 0 | 0 | 0 |
| 91  | -0.06686207 | 0.00000000 | 0 | 0 | 0 | 0 | 0 | 0 |
| 92  | 0.00000000  | 0.65741221 | 0 | 0 | 0 | 0 | 0 | 0 |
| 93  | 0.00000000  | 0.66577389 | 0 | 1 | 0 | 0 | 0 | 0 |
| 94  | 0.00000000  | 0.66577389 | 0 | 1 | 0 | 0 | 0 | 0 |
| 95  | 0.00000000  | 0.66133171 | 0 | 1 | 0 | 0 | 0 | 0 |
| 96  | -0.78058858 | 0.67303607 | 0 | 0 | 0 | 0 | 0 | 0 |
| 97  | 0.00000000  | 0.00000000 | 0 | 0 | 0 | 0 | 0 | 0 |
| 98  | -0.83714066 | 0.69549922 | 0 | 0 | 0 | 0 | 0 | 0 |
| 99  | -0.14238856 | 0.00000000 | 0 | 0 | 0 | 0 | 0 | 0 |
| 100 | -0.07880721 | 0.00000000 | 0 | 0 | 0 | 0 | 0 | 0 |
| 101 | -0.06420038 | 0.00000000 | 0 | 0 | 0 | 0 | 0 | 0 |
| 102 | -0.70700927 | 0.62620995 | 0 | 0 | 0 | 0 | 0 | 0 |
| 103 | -0.09197816 | 0.00000000 | 0 | 0 | 0 | 0 | 0 | 0 |
| 104 | -0.10420038 | 0.00000000 | 0 | 0 | 0 | 0 | 0 | 0 |
| 105 | 0.00000000  | 0.00000000 | 0 | 0 | 0 | 0 | 0 | 0 |
| 106 | -0.50683802 | 0.63512706 | 0 | 1 | 0 | 0 | 0 | 0 |
| 107 | -0.16945357 | 0.63512706 | 0 | 1 | 0 | 0 | 0 | 0 |
| 108 | -0.52336694 | 0.64012706 | 0 | 1 | 0 | 0 | 0 | 0 |
| 109 | 0.00000000  | 0.65835848 | 0 | 1 | 0 | 0 | 0 | 0 |
| 110 | 0.00000000  | 0.64418651 | 0 | 1 | 0 | 0 | 0 | 0 |
| 111 | 0.00000000  | 0.00000000 | 0 | 0 | 0 | 0 | 0 | 0 |
| 112 | -0.04492623 | 0.00000000 | 0 | 0 | 0 | 0 | 0 | 0 |
| 113 | -0.04726743 | 0.00000000 | 0 | 0 | 0 | 0 | 0 | 0 |
| 114 | 0.00000000  | 0.00000000 | 0 | 0 | 0 | 0 | 0 | 0 |
| 115 | -0.55642479 | 0.65012706 | 0 | 1 | 0 | 0 | 0 | 0 |
| 116 | -0.43605614 | 0.72606392 | 0 | 0 | 0 | 1 | 0 | 0 |
| 117 | -0.96401197 | 0.00000000 | 0 | 1 | 0 | 0 | 0 | 0 |
| 118 | 1.18635743  | 0.58225009 | 0 | 0 | 0 | 0 | 0 | 0 |
| 119 | -0.51831635 | 0.73192330 | 0 | 0 | 0 | 1 | 0 | 0 |
| 120 | -0.09865764 | 0.68242284 | 0 | 0 | 0 | 0 | 0 | 0 |
| 121 | 0.00000000  | 0.66577389 | 0 | 1 | 0 | 0 | 0 | 0 |
| 122 | 0.00000000  | 0.59414568 | 0 | 0 | 0 | 0 | 0 | 0 |
| 123 | -0.05652618 | 0.69610639 | 1 | 1 | 0 | 0 | 0 | 0 |
| 124 | -0.06294248 | 0.59625504 | 0 | 0 | 0 | 0 | 0 | 0 |
| 125 | -0.11492770 | 0.00000000 | 0 | 0 | 0 | 0 | 0 | 0 |
| 126 | 0.00000000  | 0.00000000 | 0 | 0 | 0 | 0 | 0 | 0 |
| 127 | -0.09072026 | 0.59921362 | 0 | 0 | 0 | 0 | 0 | 0 |
| 128 | -0.10294248 | 0.59972726 | 0 | 0 | 0 | 0 | 0 | 0 |
| 129 | -0.12398442 | 0.00000000 | 0 | 0 | 0 | 0 | 0 | 0 |
| 130 | -0.12912599 | 0.00000000 | 0 | 0 | 0 | 0 | 0 | 0 |
| 131 | -0.09667972 | 0.00000000 | 0 | 0 | 0 | 0 | 0 | 0 |
| 132 | -0.49926838 | 0.63814152 | 0 | 1 | 0 | 0 | 0 | 0 |
| 133 | -0.51328506 | 0.64012706 | 0 | 1 | 0 | 0 | 0 | 0 |



|     |             |            |   |   |   |   |   |   |
|-----|-------------|------------|---|---|---|---|---|---|
| 134 | -0.38473134 | 0.68153342 | 0 | 1 | 0 | 0 | 0 | 0 |
| 135 | 0.00000000  | 0.66552697 | 0 | 1 | 0 | 0 | 0 | 0 |
| 136 | -0.52154953 | 0.64512706 | 0 | 1 | 0 | 0 | 0 | 1 |
| 137 | -0.51936558 | 0.64339153 | 0 | 1 | 0 | 0 | 0 | 0 |
| 138 | -0.51765052 | 0.64207151 | 0 | 1 | 0 | 0 | 0 | 0 |
| 139 | 0.00000000  | 0.00000000 | 0 | 0 | 0 | 0 | 0 | 0 |
| 140 | -0.45117804 | 0.00000000 | 0 | 0 | 0 | 0 | 0 | 0 |
| 141 | -0.07360298 | 0.00000000 | 0 | 0 | 0 | 0 | 0 | 0 |
| 142 | -0.10138076 | 0.00000000 | 0 | 0 | 0 | 0 | 0 | 0 |
| 143 | -0.11360298 | 0.00000000 | 0 | 0 | 0 | 0 | 0 | 0 |
| 144 | -0.45952478 | 0.73050837 | 0 | 0 | 0 | 1 | 0 | 0 |
| 145 | -0.45211908 | 0.72997017 | 0 | 0 | 0 | 1 | 0 | 0 |
| 146 | -0.08347960 | 0.00000000 | 0 | 0 | 0 | 0 | 0 | 0 |
| 147 | 0.00000000  | 0.00000000 | 0 | 0 | 0 | 1 | 0 | 0 |
| 148 | -0.43064852 | 0.72596747 | 0 | 0 | 0 | 1 | 0 | 0 |
| 149 | 0.00000000  | 0.68403835 | 0 | 1 | 0 | 0 | 0 | 0 |
| 150 | -0.07454616 | 0.63512706 | 0 | 1 | 0 | 0 | 0 | 0 |
| 151 | -0.03499967 | 0.57387633 | 1 | 0 | 0 | 0 | 0 | 0 |
| 152 | -0.10859570 | 0.00000000 | 0 | 0 | 0 | 0 | 0 | 0 |
| 153 | -0.53819228 | 0.64587374 | 0 | 1 | 0 | 0 | 0 | 0 |
| 154 | -0.53401328 | 0.64425963 | 0 | 1 | 0 | 0 | 0 | 0 |
| 155 | -0.54343505 | 0.64795764 | 0 | 1 | 0 | 0 | 0 | 0 |
| 156 | -0.50595800 | 0.63512706 | 0 | 1 | 0 | 0 | 0 | 0 |
| 157 | 0.00000000  | 0.65716530 | 0 | 0 | 0 | 0 | 0 | 0 |
| 158 | -0.01555143 | 0.78360189 | 1 | 1 | 0 | 0 | 0 | 0 |
| 159 | -0.55732394 | 0.65208987 | 0 | 1 | 0 | 0 | 0 | 0 |
| 160 | 0.00000000  | 0.58050822 | 0 | 0 | 0 | 0 | 0 | 0 |
| 161 | -0.07186008 | 0.00000000 | 0 | 0 | 0 | 0 | 0 | 0 |
| 162 | -0.07777723 | 0.00000000 | 0 | 0 | 0 | 0 | 0 | 0 |
| 163 | -0.07880452 | 0.00000000 | 0 | 0 | 0 | 0 | 0 | 0 |
| 164 | -0.07696212 | 0.00000000 | 0 | 0 | 0 | 0 | 0 | 0 |
| 165 | -0.58091209 | 0.66078822 | 0 | 1 | 0 | 0 | 0 | 0 |
| 166 | -0.56149587 | 0.65339219 | 0 | 1 | 0 | 0 | 0 | 0 |
| 167 | -0.57009289 | 0.65662041 | 0 | 1 | 0 | 0 | 0 | 0 |
| 168 | -0.68773931 | 0.62793717 | 0 | 0 | 0 | 0 | 0 | 0 |
| 169 | 0.00000000  | 0.00000000 | 0 | 0 | 0 | 0 | 0 | 0 |
| 170 | -0.49798050 | 0.63364558 | 0 | 1 | 0 | 0 | 0 | 0 |
| 171 | 0.00000000  | 0.00000000 | 0 | 0 | 0 | 0 | 0 | 0 |
| 172 | -0.55625360 | 0.73666757 | 0 | 0 | 0 | 1 | 0 | 0 |
| 173 | -0.63977374 | 0.73972605 | 0 | 0 | 0 | 1 | 0 | 0 |
| 174 | -0.59037087 | 0.73805177 | 0 | 0 | 0 | 1 | 0 | 0 |
| 175 | -0.51394841 | 0.63124665 | 0 | 1 | 0 | 0 | 0 | 0 |
| 176 | -0.50492760 | 0.55125000 | 1 | 0 | 0 | 1 | 0 | 0 |
| 177 | -0.79695389 | 0.00000000 | 0 | 0 | 0 | 1 | 0 | 0 |
| 178 | 0.00000000  | 0.68403835 | 0 | 1 | 0 | 0 | 0 | 0 |
| 179 | -0.67953330 | 0.51629411 | 1 | 0 | 0 | 0 | 0 | 0 |
| 180 | -0.10733780 | 0.60069948 | 0 | 0 | 0 | 0 | 0 | 0 |
| 181 | 0.07653280  | 0.76991873 | 0 | 0 | 0 | 0 | 0 | 0 |
| 182 | -0.30753312 | 0.00000000 | 0 | 0 | 0 | 0 | 0 | 0 |
| 183 | -0.54450082 | 0.65087374 | 0 | 1 | 0 | 0 | 0 | 0 |
| 184 | -0.14107504 | 0.00000000 | 0 | 0 | 0 | 0 | 0 | 0 |

|     |             |            |   |   |   |   |   |   |
|-----|-------------|------------|---|---|---|---|---|---|
| 185 | -0.55582410 | 0.65622211 | 0 | 1 | 0 | 0 | 0 | 0 |
| 186 | 0.00000000  | 0.63545738 | 0 | 0 | 0 | 0 | 0 | 0 |
| 187 | -0.07288804 | 0.00000000 | 0 | 0 | 0 | 0 | 0 | 0 |
| 188 | 0.11979714  | 0.65664361 | 1 | 0 | 0 | 0 | 0 | 0 |
| 189 | -0.33237397 | 0.00000000 | 0 | 0 | 0 | 0 | 0 | 0 |
| 190 | -0.18399915 | 0.00000000 | 0 | 0 | 0 | 0 | 0 | 0 |
| 191 | -0.08076646 | 0.00000000 | 0 | 0 | 0 | 0 | 0 | 0 |
| 192 | -0.04531699 | 0.00000000 | 0 | 0 | 0 | 0 | 0 | 0 |
| 193 | -0.04211759 | 0.00000000 | 0 | 0 | 0 | 0 | 0 | 0 |
| 194 | -0.53141549 | 0.67312629 | 0 | 1 | 0 | 0 | 0 | 0 |
| 195 | -0.11799830 | 0.00000000 | 0 | 0 | 0 | 0 | 0 | 0 |
| 196 | 0.08299602  | 0.76607185 | 0 | 0 | 0 | 0 | 0 | 0 |
| 197 | 1.53925540  | 0.58125000 | 1 | 1 | 0 | 1 | 0 | 0 |
| 198 | 0.00000000  | 0.83509181 | 0 | 0 | 0 | 0 | 0 | 0 |
| 199 | 0.00000000  | 0.60779768 | 0 | 0 | 0 | 0 | 0 | 0 |
| 200 | -0.36941488 | 0.64134840 | 0 | 0 | 1 | 0 | 0 | 0 |
| 201 | -0.01605257 | 0.00000000 | 0 | 0 | 0 | 0 | 0 | 0 |
| 202 | -0.86359756 | 1.13814152 | 0 | 1 | 0 | 0 | 0 | 0 |
| 203 | -0.61419423 | 0.66637706 | 0 | 1 | 0 | 0 | 0 | 0 |
| 204 | -0.63258411 | 0.67231715 | 0 | 1 | 0 | 0 | 0 | 0 |
| 205 | -0.59957501 | 0.66175428 | 0 | 1 | 0 | 0 | 0 | 0 |
| 206 | -0.75937062 | 0.65666485 | 0 | 0 | 0 | 0 | 0 | 0 |
| 207 | -0.46208372 | 0.63814152 | 0 | 1 | 0 | 0 | 0 | 0 |
| 208 | -0.06121283 | 0.63512706 | 0 | 1 | 0 | 0 | 0 | 0 |
| 209 | 0.17367068  | 0.67464515 | 0 | 0 | 0 | 0 | 0 | 0 |
| 210 | -0.06661699 | 0.46892982 | 0 | 0 | 0 | 0 | 0 | 0 |
| 211 | 0.00000000  | 0.77912501 | 0 | 0 | 0 | 0 | 0 | 0 |
| 212 | -0.25617052 | 0.66245049 | 0 | 1 | 0 | 0 | 0 | 0 |
| 213 | 0.00000000  | 0.60480035 | 0 | 0 | 0 | 0 | 0 | 0 |
| 214 | -0.12217255 | 0.00000000 | 0 | 0 | 0 | 0 | 0 | 0 |
| 215 | -0.12135743 | 0.00000000 | 0 | 0 | 0 | 0 | 0 | 0 |
| 216 | -0.00955365 | 0.60901595 | 1 | 0 | 0 | 0 | 0 | 0 |
| 217 | 0.00719650  | 0.00000000 | 0 | 0 | 0 | 0 | 0 | 0 |
| 218 | -0.81030601 | 0.63759968 | 0 | 0 | 0 | 0 | 0 | 0 |
| 219 | -0.51435828 | 0.64671081 | 0 | 1 | 0 | 0 | 0 | 0 |
| 220 | -0.21000912 | 0.66317451 | 0 | 1 | 0 | 0 | 0 | 0 |
| 221 | 0.48049449  | 0.48845947 | 1 | 0 | 0 | 0 | 0 | 0 |
| 222 | 0.00000000  | 0.76723773 | 0 | 0 | 0 | 0 | 0 | 0 |
| 223 | -0.28937294 | 0.59688281 | 0 | 0 | 0 | 0 | 0 | 0 |
| 224 | 0.00000000  | 0.51263251 | 1 | 0 | 0 | 0 | 0 | 0 |
| 225 | 0.49851108  | 0.47641298 | 1 | 0 | 0 | 0 | 0 | 0 |
| 226 | -0.05471246 | 0.00000000 | 0 | 0 | 0 | 0 | 0 | 0 |
| 227 | -0.58326517 | 0.65621675 | 0 | 1 | 0 | 0 | 0 | 0 |
| 228 | 0.00000000  | 0.50362422 | 1 | 0 | 0 | 0 | 0 | 0 |
| 229 | 0.12579206  | 0.76991873 | 0 | 0 | 0 | 0 | 0 | 0 |
| 230 | -0.47401144 | 0.66939152 | 0 | 1 | 0 | 0 | 0 | 0 |
| 231 | -0.62876723 | 0.67637706 | 0 | 1 | 0 | 0 | 0 | 1 |
| 232 | 0.07023651  | 0.80991873 | 0 | 0 | 0 | 0 | 0 | 0 |
| 233 | 0.07023651  | 0.80991873 | 0 | 0 | 0 | 0 | 0 | 0 |
| 234 | 0.11197412  | 0.60901595 | 1 | 0 | 0 | 0 | 0 | 0 |
| 235 | -0.94613856 | 0.00000000 | 0 | 0 | 0 | 0 | 0 | 0 |

|     |             |            |   |   |   |   |   |   |
|-----|-------------|------------|---|---|---|---|---|---|
| 236 | 0.00197750  | 0.87509963 | 0 | 0 | 0 | 0 | 0 | 0 |
| 237 | 0.00000000  | 0.60480035 | 0 | 0 | 0 | 0 | 0 | 0 |
| 238 | 0.00000000  | 0.67144413 | 0 | 1 | 0 | 0 | 0 | 0 |
| 239 | 0.03044635  | 0.82033540 | 0 | 0 | 0 | 0 | 0 | 0 |
| 240 | -0.51153340 | 0.64489949 | 0 | 1 | 0 | 0 | 0 | 0 |
| 241 | 0.03037823  | 0.85589095 | 0 | 0 | 0 | 0 | 0 | 0 |
| 242 | -0.16588592 | 0.65671444 | 0 | 1 | 0 | 0 | 0 | 0 |
| 243 | 0.48312013  | 0.48340565 | 1 | 0 | 0 | 0 | 0 | 0 |
| 244 | -0.51979786 | 0.64989949 | 0 | 1 | 0 | 0 | 0 | 0 |
| 245 | 0.07669972  | 0.80607185 | 0 | 0 | 0 | 0 | 0 | 0 |
| 246 | -0.52806233 | 0.65489949 | 0 | 1 | 0 | 0 | 0 | 1 |
| 247 | -0.02517733 | 0.89589095 | 0 | 0 | 0 | 0 | 0 | 0 |
| 248 | 1.38886710  | 0.50921064 | 1 | 0 | 0 | 0 | 0 | 0 |
| 249 | -0.26775091 | 0.72034490 | 0 | 0 | 0 | 0 | 0 | 0 |
| 250 | -0.45260026 | 0.58687500 | 1 | 0 | 0 | 0 | 0 | 0 |
| 251 | 0.38480737  | 0.52630960 | 1 | 0 | 0 | 0 | 0 | 0 |
| 252 | -0.00676967 | 0.88208115 | 0 | 0 | 0 | 0 | 0 | 0 |
| 253 | -0.76460210 | 0.65666485 | 0 | 0 | 0 | 0 | 0 | 0 |
| 254 | 0.00000000  | 0.53140200 | 1 | 0 | 0 | 0 | 0 | 0 |
| 255 | -0.47859939 | 0.69369708 | 0 | 1 | 0 | 0 | 0 | 0 |
| 256 | -0.05186847 | 0.90061318 | 0 | 0 | 0 | 0 | 0 | 0 |
| 257 | -0.03964625 | 0.88936318 | 0 | 0 | 0 | 0 | 0 | 0 |
| 258 | 0.00000000  | 0.00000000 | 0 | 0 | 0 | 0 | 0 | 1 |
| 259 | -0.64221611 | 0.68050930 | 0 | 1 | 0 | 0 | 0 | 1 |
| 260 | -0.54421417 | 0.00000000 | 0 | 0 | 0 | 0 | 0 | 0 |
| 261 | -0.07302754 | 0.00000000 | 0 | 0 | 0 | 0 | 0 | 0 |
| 262 | -0.29287939 | 0.67761812 | 0 | 1 | 0 | 0 | 0 | 0 |
| 263 | 0.00906367  | 0.87509963 | 0 | 0 | 0 | 0 | 0 | 0 |
| 264 | 0.03507597  | 0.82033540 | 0 | 0 | 0 | 0 | 0 | 0 |
| 265 | -0.54994785 | 0.65773007 | 0 | 1 | 0 | 0 | 0 | 0 |
| 266 | -0.14081364 | 0.65227227 | 0 | 1 | 0 | 0 | 0 | 0 |
| 267 | 0.09484031  | 0.79384963 | 0 | 0 | 0 | 0 | 0 | 0 |
| 268 | 0.00000000  | 0.63524034 | 0 | 0 | 0 | 0 | 0 | 0 |
| 269 | -0.37638989 | 0.79177237 | 0 | 0 | 1 | 0 | 0 | 0 |
| 270 | -0.04503972 | 0.00000000 | 0 | 0 | 0 | 0 | 0 | 0 |
| 271 | -0.58138591 | 0.96125461 | 1 | 0 | 0 | 1 | 0 | 0 |
| 272 | -0.50449330 | 0.64341801 | 0 | 1 | 0 | 0 | 0 | 0 |
| 273 | -0.08878108 | 0.53016002 | 0 | 0 | 0 | 0 | 0 | 0 |
| 274 | -0.27673156 | 0.94330370 | 0 | 0 | 0 | 0 | 0 | 0 |
| 275 | -0.58870406 | 0.96331558 | 0 | 0 | 1 | 0 | 0 | 0 |
| 276 | -0.51896826 | 0.63847575 | 0 | 1 | 0 | 0 | 0 | 0 |
| 277 | 0.00000000  | 0.54983876 | 1 | 0 | 0 | 0 | 0 | 1 |
| 278 | -0.04478230 | 0.90061318 | 0 | 0 | 0 | 0 | 0 | 0 |
| 279 | -0.03256008 | 0.88936318 | 0 | 0 | 0 | 0 | 0 | 0 |
| 280 | -0.03501662 | 0.89498818 | 0 | 0 | 0 | 0 | 0 | 0 |
| 281 | 0.12373172  | 0.65572241 | 1 | 0 | 0 | 0 | 0 | 0 |
| 282 | 0.00000000  | 0.60292515 | 0 | 0 | 0 | 0 | 0 | 0 |
| 283 | -0.04008726 | 0.00000000 | 0 | 0 | 0 | 0 | 0 | 0 |
| 284 | 0.00000000  | 0.59861074 | 0 | 0 | 0 | 0 | 0 | 0 |
| 285 | -0.63388535 | 0.57852746 | 0 | 1 | 0 | 0 | 0 | 0 |
| 286 | -0.26329654 | 0.72370638 | 0 | 0 | 0 | 0 | 0 | 0 |

|     |             |            |   |   |   |   |   |   |
|-----|-------------|------------|---|---|---|---|---|---|
| 287 | -0.16555706 | 0.86366873 | 0 | 0 | 0 | 0 | 0 | 0 |
| 288 | -0.39077022 | 0.00000000 | 0 | 0 | 1 | 0 | 0 | 0 |
| 289 | -0.24215146 | 0.49472010 | 0 | 0 | 0 | 1 | 0 | 0 |
| 290 | -0.09693791 | 0.89691987 | 0 | 0 | 0 | 0 | 0 | 0 |
| 291 | -0.31189209 | 0.95217944 | 0 | 0 | 0 | 0 | 0 | 0 |
| 292 | -0.52022002 | 0.65181032 | 0 | 1 | 0 | 0 | 0 | 1 |
| 293 | -0.52048042 | 0.65082151 | 0 | 1 | 0 | 0 | 0 | 1 |
| 294 | -0.66576508 | 0.00000000 | 0 | 0 | 0 | 0 | 0 | 0 |
| 295 | -0.08093846 | 0.90132498 | 0 | 0 | 0 | 0 | 0 | 0 |
| 296 | -0.11742286 | 0.00000000 | 0 | 0 | 0 | 0 | 0 | 0 |
| 297 | 0.00000000  | 0.53550303 | 0 | 0 | 0 | 0 | 0 | 0 |
| 298 | -1.04129894 | 0.00000000 | 0 | 0 | 0 | 0 | 0 | 1 |
| 299 | -0.33373723 | 0.62117797 | 0 | 1 | 0 | 1 | 0 | 0 |
| 300 | -0.52728758 | 0.43653696 | 0 | 0 | 0 | 0 | 0 | 0 |
| 301 | -0.17352764 | 0.66317451 | 0 | 1 | 0 | 0 | 1 | 0 |
| 302 | -0.06449836 | 0.89213670 | 0 | 0 | 0 | 0 | 0 | 0 |
| 303 | -0.39290882 | 0.63228908 | 0 | 1 | 0 | 1 | 0 | 0 |
| 304 | -0.37478408 | 0.77090948 | 0 | 0 | 0 | 0 | 0 | 0 |
| 305 | -0.16092743 | 0.86366873 | 0 | 0 | 0 | 0 | 0 | 0 |
| 306 | -0.39336281 | 0.80003683 | 0 | 0 | 1 | 0 | 0 | 0 |
| 307 | -0.39336281 | 0.80003683 | 0 | 0 | 1 | 0 | 0 | 0 |
| 308 | -0.63686317 | 0.00000000 | 0 | 0 | 0 | 0 | 0 | 0 |
| 309 | -0.71665953 | 0.00000000 | 0 | 0 | 0 | 0 | 0 | 0 |
| 310 | -0.54210554 | 0.65464089 | 0 | 1 | 0 | 0 | 0 | 0 |
| 311 | -0.54236594 | 0.65365209 | 0 | 1 | 0 | 0 | 0 | 0 |
| 312 | -0.54210554 | 0.65464089 | 0 | 1 | 0 | 0 | 0 | 0 |
| 313 | -0.58062638 | 0.61617120 | 0 | 0 | 0 | 0 | 0 | 1 |
| 314 | -0.60946280 | 0.97331558 | 0 | 0 | 1 | 0 | 0 | 0 |
| 315 | -0.32809579 | 0.95217944 | 1 | 0 | 0 | 0 | 0 | 0 |
| 316 | -0.07705472 | 0.54744941 | 0 | 0 | 0 | 0 | 0 | 0 |
| 317 | -0.37755221 | 0.64970522 | 0 | 0 | 1 | 0 | 0 | 0 |
| 318 | -0.68109142 | 0.00000000 | 0 | 1 | 0 | 1 | 0 | 0 |
| 319 | -0.33469365 | 0.62117797 | 0 | 1 | 0 | 1 | 0 | 0 |
| 320 | 0.00356723  | 0.93010240 | 0 | 0 | 0 | 0 | 0 | 0 |
| 321 | -0.83265885 | 0.00000000 | 0 | 0 | 0 | 0 | 0 | 0 |
| 322 | -0.23331688 | 0.00000000 | 0 | 0 | 0 | 0 | 0 | 0 |
| 323 | 0.00000000  | 0.64217263 | 0 | 0 | 0 | 0 | 0 | 0 |
| 324 | -0.70376612 | 0.00000000 | 0 | 0 | 0 | 0 | 0 | 0 |
| 325 | -0.36954473 | 0.79409582 | 0 | 0 | 1 | 0 | 0 | 0 |
| 326 | -0.37185838 | 0.79631469 | 0 | 0 | 1 | 0 | 0 | 0 |
| 327 | -0.57970624 | 0.61617120 | 0 | 0 | 0 | 0 | 0 | 1 |
| 328 | -0.38014480 | 0.79586660 | 0 | 0 | 1 | 0 | 0 | 0 |
| 329 | -1.00886073 | 0.00000000 | 0 | 0 | 0 | 0 | 0 | 0 |
| 330 | -0.62384314 | 0.00000000 | 0 | 0 | 1 | 0 | 0 | 0 |
| 331 | -0.14081723 | 0.49355074 | 0 | 0 | 0 | 0 | 0 | 0 |
| 332 | -0.37057202 | 0.79470716 | 0 | 0 | 1 | 0 | 0 | 0 |
| 333 | -0.37317839 | 0.79708516 | 0 | 0 | 1 | 0 | 0 | 0 |
| 334 | -0.65251858 | 0.00000000 | 0 | 0 | 0 | 0 | 0 | 0 |
| 335 | -0.01989130 | 0.51741141 | 0 | 0 | 0 | 0 | 0 | 0 |
| 336 | -0.18766064 | 0.67317451 | 0 | 1 | 0 | 0 | 1 | 1 |
| 337 | -0.46860859 | 0.00000000 | 0 | 0 | 0 | 0 | 0 | 0 |

|     |             |            |   |   |   |   |   |   |
|-----|-------------|------------|---|---|---|---|---|---|
| 338 | -0.22897435 | 0.00000000 | 0 | 0 | 0 | 0 | 0 | 0 |
| 339 | -0.42321128 | 0.80279157 | 0 | 0 | 1 | 0 | 0 | 0 |
| 340 | -0.62835786 | 0.68306032 | 0 | 1 | 0 | 0 | 0 | 1 |
| 341 | -0.64535439 | 0.68306032 | 0 | 1 | 0 | 0 | 0 | 1 |
| 342 | -0.63108934 | 0.68306032 | 0 | 1 | 0 | 0 | 0 | 1 |
| 343 | -0.63174694 | 0.68908786 | 0 | 1 | 0 | 0 | 0 | 1 |
| 344 | -0.21869347 | 0.00000000 | 0 | 0 | 0 | 0 | 0 | 0 |
| 345 | -0.75166135 | 0.91972931 | 0 | 0 | 0 | 0 | 0 | 0 |
| 346 | -0.75166135 | 0.91972931 | 0 | 0 | 0 | 0 | 0 | 0 |
| 347 | -0.75166135 | 0.91972931 | 0 | 0 | 0 | 0 | 0 | 0 |
| 348 | -0.12145003 | 0.55021949 | 0 | 0 | 0 | 0 | 0 | 0 |
| 349 | -0.88287788 | 0.67488844 | 0 | 0 | 0 | 0 | 0 | 0 |
| 350 | -0.47226051 | 0.49798792 | 1 | 0 | 0 | 0 | 0 | 0 |
| 351 | -0.59886033 | 0.97354861 | 0 | 0 | 1 | 0 | 0 | 0 |
| 352 | -0.60514477 | 0.97625037 | 0 | 0 | 1 | 0 | 0 | 0 |
| 353 | -0.37422882 | 0.79432339 | 0 | 0 | 1 | 0 | 0 | 0 |
| 354 | -0.62808149 | 0.68273031 | 0 | 1 | 0 | 0 | 0 | 1 |
| 355 | -0.51169698 | 0.65741506 | 0 | 0 | 0 | 0 | 0 | 1 |
| 356 | -0.13873402 | 0.62255184 | 0 | 0 | 0 | 0 | 0 | 1 |
| 357 | -1.02501709 | 1.18658540 | 0 | 0 | 0 | 0 | 0 | 0 |
| 358 | -0.62743772 | 0.68306032 | 0 | 1 | 0 | 0 | 0 | 1 |
| 359 | -0.72626096 | 0.00000000 | 0 | 0 | 0 | 0 | 0 | 0 |
| 360 | -0.64351198 | 0.74163033 | 0 | 0 | 0 | 0 | 0 | 1 |
| 361 | -0.59670049 | 0.97308801 | 0 | 0 | 1 | 0 | 0 | 0 |
| 362 | -0.59798685 | 0.97489932 | 0 | 0 | 1 | 0 | 0 | 0 |
| 363 | -0.09667263 | 0.66269831 | 0 | 0 | 0 | 1 | 0 | 1 |
| 364 | -0.19514177 | 0.65932843 | 0 | 0 | 0 | 0 | 0 | 0 |
| 365 | -0.60261765 | 0.97563903 | 0 | 0 | 1 | 0 | 0 | 0 |
| 366 | -0.60364493 | 0.97604659 | 0 | 0 | 1 | 0 | 0 | 0 |
| 367 | -0.60493129 | 0.97785790 | 0 | 0 | 1 | 0 | 0 | 0 |
| 368 | -0.60625131 | 0.97837154 | 0 | 0 | 1 | 0 | 0 | 0 |
| 369 | -0.60496495 | 0.97656023 | 0 | 0 | 1 | 0 | 0 | 0 |
| 370 | 0.14196326  | 0.74865673 | 0 | 0 | 0 | 0 | 0 | 0 |
| 371 | -0.40458297 | 0.57832751 | 1 | 1 | 0 | 0 | 0 | 0 |
| 372 | -0.36832665 | 0.79432339 | 0 | 0 | 1 | 0 | 0 | 0 |
| 373 | -0.60364493 | 0.97625037 | 0 | 0 | 1 | 0 | 0 | 0 |
| 374 | -0.05856340 | 0.72295639 | 0 | 1 | 0 | 0 | 0 | 0 |
| 375 | -0.79370513 | 0.72776121 | 0 | 0 | 0 | 0 | 0 | 0 |
| 376 | -0.58355577 | 0.96904758 | 0 | 0 | 1 | 0 | 0 | 0 |
| 377 | -1.25678832 | 0.97824551 | 0 | 0 | 0 | 0 | 0 | 0 |
| 378 | -0.66447476 | 0.70000476 | 0 | 1 | 0 | 0 | 0 | 1 |
| 379 | -0.63220893 | 0.00000000 | 0 | 0 | 0 | 0 | 0 | 0 |
| 380 | 0.00000000  | 0.00000000 | 0 | 0 | 0 | 0 | 0 | 0 |
| 381 | -1.08121726 | 0.00000000 | 0 | 0 | 0 | 0 | 0 | 0 |
| 382 | -0.65897053 | 0.75912524 | 0 | 1 | 0 | 0 | 0 | 1 |
| 383 | -0.61669698 | 0.68607477 | 0 | 1 | 0 | 0 | 0 | 1 |
| 384 | -0.62663800 | 0.68306032 | 0 | 1 | 0 | 0 | 0 | 1 |
| 385 | -0.62669698 | 0.68306032 | 0 | 1 | 0 | 0 | 0 | 1 |
| 386 | -0.62910038 | 0.68273152 | 0 | 1 | 0 | 0 | 0 | 1 |
| 387 | -0.64604883 | 0.68734036 | 0 | 1 | 0 | 0 | 0 | 1 |
| 388 | -0.01901949 | 0.00000000 | 0 | 0 | 0 | 0 | 0 | 0 |

|     |             |            |   |   |   |   |   |   |
|-----|-------------|------------|---|---|---|---|---|---|
| 389 | -0.40938853 | 0.00000000 | 0 | 0 | 0 | 0 | 0 | 0 |
| 390 | -0.09726761 | 0.77704952 | 0 | 0 | 0 | 1 | 0 | 1 |
| 391 | -0.18779843 | 0.70150945 | 1 | 0 | 0 | 0 | 0 | 0 |
| 392 | -0.60227522 | 0.97563903 | 0 | 0 | 1 | 0 | 0 | 0 |
| 393 | -0.61410954 | 0.97819005 | 0 | 0 | 1 | 0 | 0 | 0 |
| 394 | -0.62237400 | 0.98166227 | 0 | 0 | 1 | 0 | 0 | 0 |
| 395 | -0.62052175 | 0.98122739 | 0 | 0 | 1 | 0 | 0 | 0 |
| 396 | -0.36734046 | 0.79432339 | 0 | 0 | 1 | 0 | 0 | 0 |
| 397 | -0.36734046 | 0.79432339 | 0 | 0 | 1 | 0 | 0 | 0 |
| 398 | -0.36753003 | 0.79399459 | 0 | 0 | 1 | 0 | 0 | 0 |
| 399 | -0.54392653 | 0.68526565 | 0 | 1 | 0 | 1 | 1 | 1 |
| 400 | -0.75518238 | 0.99667263 | 0 | 0 | 0 | 0 | 0 | 0 |
| 401 | -1.25620980 | 0.97824551 | 0 | 0 | 0 | 0 | 0 | 0 |
| 402 | -0.33809286 | 0.70801137 | 1 | 0 | 0 | 0 | 0 | 0 |
| 403 | -0.62913247 | 0.68273152 | 0 | 1 | 0 | 0 | 0 | 1 |
| 404 | -0.60265747 | 0.97586660 | 0 | 0 | 1 | 0 | 0 | 0 |
| 405 | -0.59880697 | 0.66970522 | 0 | 0 | 1 | 0 | 0 | 0 |
| 406 | -0.19728103 | 0.63963427 | 0 | 1 | 0 | 0 | 0 | 0 |
| 407 | -0.64715092 | 0.00000000 | 0 | 0 | 0 | 0 | 0 | 0 |
| 408 | -0.65042714 | 0.74163033 | 0 | 1 | 0 | 0 | 0 | 1 |
| 409 | -0.20253976 | 0.74163033 | 0 | 0 | 0 | 0 | 0 | 1 |
| 410 | -0.69124346 | 0.79718588 | 0 | 1 | 0 | 0 | 0 | 1 |
| 411 | -0.64486045 | 0.73075453 | 0 | 1 | 0 | 0 | 0 | 1 |
| 412 | -0.64486045 | 0.73075453 | 0 | 1 | 0 | 0 | 0 | 1 |
| 413 | -0.63094928 | 0.68306032 | 0 | 1 | 0 | 0 | 0 | 1 |
| 414 | -0.38749689 | 0.80010705 | 0 | 0 | 1 | 0 | 0 | 0 |
| 415 | -0.67413479 | 0.74637953 | 0 | 1 | 0 | 0 | 0 | 1 |
| 416 | -0.73205979 | 0.87776828 | 0 | 1 | 0 | 0 | 0 | 1 |
| 417 | -0.77266843 | 0.99406712 | 0 | 0 | 0 | 0 | 0 | 0 |
| 418 | -0.77276732 | 0.99447468 | 0 | 0 | 0 | 0 | 0 | 0 |
| 419 | -0.38527065 | 0.00000000 | 0 | 0 | 0 | 0 | 0 | 0 |
| 420 | 0.07792902  | 0.68696039 | 1 | 0 | 0 | 0 | 0 | 0 |
| 421 | -0.79307660 | 1.00427120 | 0 | 0 | 0 | 0 | 0 | 0 |
| 422 | -0.79317548 | 1.00467876 | 0 | 0 | 0 | 0 | 0 | 0 |
| 423 | -0.29487834 | 0.70442451 | 0 | 1 | 0 | 0 | 1 | 1 |
| 424 | -0.26660282 | 0.66488717 | 0 | 0 | 0 | 0 | 0 | 0 |
| 425 | -0.75263074 | 0.99873697 | 0 | 0 | 0 | 0 | 0 | 0 |
| 426 | -0.75088636 | 0.99667263 | 0 | 0 | 0 | 0 | 0 | 0 |
| 427 | -0.75088636 | 0.99667263 | 0 | 0 | 0 | 0 | 0 | 0 |
| 428 | -0.46948300 | 0.53683350 | 0 | 0 | 0 | 0 | 0 | 0 |
| 429 | -0.21529434 | 0.00000000 | 0 | 0 | 0 | 0 | 0 | 0 |
| 430 | -0.75693398 | 0.98875708 | 0 | 0 | 0 | 0 | 0 | 0 |
| 431 | -0.75693398 | 0.98875708 | 0 | 0 | 0 | 0 | 0 | 0 |
| 432 | -0.75693398 | 0.98875708 | 0 | 0 | 0 | 0 | 0 | 0 |
| 433 | -0.59395364 | 0.00000000 | 0 | 0 | 0 | 0 | 0 | 0 |
| 434 | -0.58553369 | 0.00000000 | 0 | 0 | 0 | 0 | 0 | 0 |
| 435 | -0.39636048 | 0.80024055 | 0 | 0 | 1 | 0 | 0 | 0 |
| 436 | -0.59840350 | 0.97551305 | 0 | 0 | 1 | 0 | 0 | 0 |
| 437 | -0.59994739 | 0.97771180 | 0 | 0 | 1 | 0 | 0 | 0 |
| 438 | -0.93588727 | 1.13051922 | 0 | 0 | 0 | 0 | 0 | 1 |
| 439 | -1.27376124 | 0.99059119 | 0 | 0 | 0 | 1 | 0 | 1 |

|     |             |            |   |   |   |   |   |   |
|-----|-------------|------------|---|---|---|---|---|---|
| 440 | -1.27092131 | 0.98824551 | 0 | 0 | 0 | 0 | 0 | 0 |
| 441 | -0.65670829 | 0.69242537 | 0 | 1 | 0 | 0 | 0 | 1 |
| 442 | -0.60139957 | 0.97586660 | 0 | 0 | 1 | 0 | 0 | 0 |
| 443 | -0.60139957 | 0.97586660 | 0 | 0 | 1 | 0 | 0 | 0 |
| 444 | -0.19695943 | 0.74737062 | 0 | 0 | 0 | 0 | 0 | 0 |
| 445 | -0.63586506 | 0.71732477 | 0 | 1 | 0 | 0 | 0 | 1 |
| 446 | -0.64543139 | 0.79718588 | 0 | 1 | 0 | 0 | 0 | 1 |
| 447 | -0.53307684 | 0.00000000 | 0 | 0 | 0 | 0 | 0 | 0 |
| 448 | -0.10215564 | 0.70610109 | 0 | 0 | 0 | 1 | 0 | 1 |
| 449 | -0.10215564 | 0.70610109 | 0 | 0 | 0 | 1 | 0 | 1 |
| 450 | -0.23945910 | 0.72347876 | 1 | 0 | 0 | 0 | 0 | 0 |
| 451 | -0.36963125 | 0.79643726 | 0 | 0 | 1 | 0 | 0 | 0 |
| 452 | -0.59625732 | 0.68333129 | 0 | 1 | 0 | 0 | 0 | 1 |
| 453 | -0.69042791 | 0.86732730 | 1 | 0 | 0 | 1 | 0 | 1 |
| 454 | -0.69042791 | 0.86732730 | 1 | 0 | 0 | 1 | 0 | 1 |
| 455 | -0.69382927 | 0.87028588 | 1 | 0 | 0 | 1 | 0 | 1 |
| 456 | -0.57237236 | 0.82392452 | 1 | 0 | 0 | 1 | 0 | 1 |
| 457 | -0.57237236 | 0.82392452 | 1 | 0 | 0 | 1 | 0 | 1 |
| 458 | -0.26957387 | 0.67662777 | 1 | 0 | 0 | 0 | 0 | 0 |
| 459 | -0.62229255 | 0.68273152 | 0 | 1 | 0 | 0 | 0 | 1 |
| 460 | -0.60060294 | 0.97553780 | 0 | 0 | 1 | 0 | 0 | 0 |
| 461 | -0.36927535 | 0.79837694 | 0 | 0 | 1 | 0 | 0 | 0 |
| 462 | -0.63009874 | 0.68427473 | 0 | 1 | 0 | 0 | 0 | 1 |
| 463 | -0.29146986 | 0.53344893 | 0 | 0 | 0 | 0 | 0 | 0 |
| 464 | -0.26806341 | 0.61397405 | 0 | 0 | 0 | 0 | 0 | 0 |
| 465 | -0.60468638 | 0.72318055 | 1 | 0 | 0 | 0 | 0 | 1 |
| 466 | -1.32276951 | 1.00559119 | 0 | 0 | 0 | 1 | 0 | 1 |
| 467 | -1.32276951 | 1.00559119 | 0 | 0 | 0 | 1 | 0 | 1 |
| 468 | -1.33297935 | 1.00910971 | 0 | 0 | 0 | 1 | 0 | 1 |
| 469 | -0.46484161 | 0.72367696 | 1 | 0 | 0 | 0 | 0 | 0 |
| 470 | -0.49491504 | 1.13051922 | 0 | 0 | 0 | 0 | 0 | 1 |
| 471 | -0.24300256 | 0.69846495 | 0 | 0 | 0 | 0 | 0 | 0 |
| 472 | -0.62235389 | 0.68047129 | 0 | 1 | 0 | 0 | 0 | 1 |
| 473 | -0.63208649 | 0.68273152 | 1 | 1 | 0 | 0 | 0 | 1 |
| 474 | -0.75401546 | 0.00000000 | 0 | 0 | 0 | 0 | 0 | 0 |
| 475 | -0.36847563 | 0.79837694 | 0 | 0 | 1 | 0 | 0 | 0 |
| 476 | -0.61284552 | 0.71732477 | 0 | 1 | 0 | 0 | 0 | 1 |
| 477 | -0.37144753 | 0.79943036 | 0 | 0 | 1 | 0 | 0 | 0 |
| 478 | -1.26777512 | 0.99034428 | 0 | 0 | 0 | 1 | 0 | 1 |
| 479 | -0.33462977 | 0.64586932 | 0 | 1 | 0 | 1 | 0 | 0 |
| 480 | -0.91084829 | 0.71651565 | 0 | 1 | 0 | 1 | 1 | 1 |
| 481 | -0.39487207 | 0.00000000 | 0 | 0 | 0 | 0 | 0 | 0 |
| 482 | 0.00000000  | 0.58149228 | 0 | 0 | 0 | 0 | 0 | 0 |
| 483 | -0.36985885 | 0.79819005 | 0 | 0 | 1 | 0 | 0 | 0 |
| 484 | -0.37086653 | 0.79811064 | 0 | 0 | 1 | 0 | 0 | 0 |
| 485 | -0.05610583 | 0.63255514 | 0 | 0 | 0 | 0 | 0 | 0 |
| 486 | -0.37812331 | 0.80166227 | 0 | 0 | 1 | 0 | 0 | 0 |
| 487 | -0.65241787 | 0.72613913 | 1 | 1 | 0 | 0 | 0 | 1 |
| 488 | -0.60314863 | 0.84897475 | 0 | 0 | 0 | 0 | 0 | 1 |
| 489 | -0.36774126 | 0.79804532 | 0 | 0 | 1 | 0 | 0 | 0 |
| 490 | -0.60625452 | 0.98165025 | 0 | 0 | 1 | 0 | 0 | 0 |

|     |             |            |   |   |   |   |   |   |
|-----|-------------|------------|---|---|---|---|---|---|
| 491 | -0.65346812 | 0.72110776 | 0 | 1 | 0 | 0 | 0 | 1 |
| 492 | -0.60725161 | 0.97992015 | 0 | 0 | 1 | 0 | 0 | 0 |
| 493 | -0.07799964 | 0.00000000 | 0 | 0 | 0 | 0 | 0 | 0 |
| 494 | -0.40338759 | 0.80308133 | 0 | 0 | 1 | 0 | 0 | 0 |
| 495 | -0.21862764 | 0.68721878 | 0 | 1 | 0 | 1 | 1 | 1 |
| 496 | -0.64587465 | 0.71308092 | 0 | 1 | 0 | 0 | 0 | 1 |
| 497 | -0.71040799 | 0.79095462 | 1 | 0 | 0 | 0 | 0 | 1 |
| 498 | -0.31576203 | 0.00000000 | 0 | 0 | 0 | 0 | 0 | 0 |
| 499 | -0.60154855 | 0.97992015 | 0 | 0 | 1 | 0 | 0 | 0 |
| 500 | -0.26256475 | 0.00000000 | 0 | 0 | 0 | 0 | 0 | 0 |
| 501 | -0.25414480 | 0.00000000 | 0 | 0 | 0 | 0 | 0 | 0 |
| 502 | -0.64271768 | 0.81759405 | 0 | 1 | 0 | 0 | 0 | 1 |
| 503 | -0.07358924 | 0.67330214 | 0 | 0 | 0 | 0 | 0 | 0 |
| 504 | -0.36640478 | 0.79768726 | 0 | 0 | 1 | 0 | 0 | 0 |
| 505 | -0.07601108 | 0.77807650 | 0 | 0 | 0 | 1 | 0 | 1 |
| 506 | -0.21482361 | 0.68699575 | 0 | 1 | 0 | 1 | 1 | 1 |
| 507 | -0.21307933 | 0.68721878 | 0 | 1 | 0 | 1 | 1 | 1 |
| 508 | -0.21319595 | 0.68699575 | 0 | 1 | 0 | 1 | 1 | 1 |
| 509 | -0.53876496 | 0.71846878 | 0 | 1 | 0 | 1 | 1 | 1 |
| 510 | -0.20928327 | 0.68721878 | 0 | 1 | 0 | 1 | 1 | 1 |
| 511 | -0.20928327 | 0.68721878 | 0 | 1 | 0 | 1 | 1 | 1 |
| 512 | -1.19879316 | 1.05531187 | 0 | 0 | 0 | 0 | 0 | 0 |
| 513 | -1.69879316 | 1.10488610 | 0 | 0 | 0 | 0 | 0 | 0 |
| 514 | -0.36890385 | 0.71846878 | 0 | 1 | 0 | 1 | 1 | 1 |
| 515 | -0.48070657 | 0.71824575 | 0 | 1 | 0 | 1 | 1 | 1 |
| 516 | -0.36250929 | 0.71824575 | 0 | 1 | 0 | 1 | 1 | 1 |
| 517 | -0.32131409 | 0.71846878 | 0 | 1 | 0 | 1 | 1 | 1 |
| 518 | -0.32131409 | 0.71846878 | 0 | 1 | 0 | 1 | 1 | 1 |
| 519 | -0.68184973 | 0.76720265 | 1 | 1 | 0 | 0 | 0 | 1 |
| 520 | -1.46365249 | 1.13629567 | 0 | 0 | 0 | 0 | 0 | 0 |
| 521 | -1.21747277 | 1.05482449 | 0 | 0 | 0 | 0 | 0 | 0 |
| 522 | -1.20258508 | 1.04540156 | 0 | 0 | 0 | 0 | 0 | 0 |
| 523 | -1.22612214 | 1.06503743 | 0 | 0 | 0 | 0 | 0 | 0 |
| 524 | -1.20653584 | 1.04700889 | 0 | 0 | 0 | 0 | 0 | 0 |
| 525 | -1.19224167 | 1.06025426 | 0 | 0 | 0 | 0 | 0 | 0 |
| 526 | -1.19399953 | 1.06092596 | 0 | 0 | 0 | 0 | 0 | 0 |
| 527 | -1.19353093 | 1.13583619 | 0 | 0 | 0 | 0 | 0 | 0 |
| 528 | -1.18862570 | 1.06330097 | 0 | 0 | 0 | 0 | 0 | 0 |
| 529 | -0.53468988 | 0.69351177 | 0 | 0 | 0 | 0 | 0 | 0 |
| 530 | -1.21637666 | 1.14273494 | 0 | 0 | 0 | 0 | 0 | 0 |



### The Replacement Method (RM) procedure

The procedure of the RM technique is as follows: choose  $d$  descriptors,  $\{X_1, X_2, \dots, X_d\}$  at random and do a linear regression. Choose one of the descriptors of this set, called  $X_i$ , and replaced it by each of the  $D$  descriptors set (except itself) keeping the best resulting set. Since one can start replacing any of the  $d$  descriptors in the initial model, then a regression equation with  $d$  variables has  $d$  possible paths to achieve the final result; one example, the choice above will develop into path  $i$ . Next choose the variable with greatest relative error in it is coefficient (except the one replaced in the previous step) and replace it with all the  $D$  descriptors (except itself) keeping again the best set. Replace the entire remaining variable having greatest relative error in the coefficient and repeat the whole process. The process will repeat as many times as needed until the set of descriptors remains unchanged. At the end, we have the best model for the path  $i$ . Proceed in exactly the same way for all possible paths  $i=1, 2, \dots, d$ , compare the resulting models, and keep the best one. Our numerical experiments show that in this way one obtains a model almost as good as the best one with much less than  $D!/(D-d)!d!$  linear regressions when this combinatorial number is large.

### The Balanced Subsets Method (BSM)

The BSM procedure for generating 3 balanced subsets (training, validation and test sets) consists on the next steps:

1. Prepare the  $\mathbf{C}$  matrix that includes the experimental property of  $N$  compounds and  $D$  non-conformational descriptors. The size of  $\mathbf{C}$  is  $N \times (D+1)$ .
2. Remove the linearly dependent descriptors from  $\mathbf{C}$ . The new size of  $\mathbf{C}$  is  $N \times (D^* + 1)$ .
3. Standardize  $\mathbf{C}$  for centering and scaling its matrix elements as the  $\mathbf{C}^{\text{stand}}$  matrix. This is done for discerning better the matrix elements. The size of  $\mathbf{C}^{\text{stand}}$  is  $N \times (D^* + 1)$ .
4. Use  $\mathbf{C}^{\text{stand}}$  together with the Euclidean metrics and  $N_{\text{runs}} = 10,000$  runs in the optimization procedure of k-MCA, in order to achieve the best solution for creating  $N_{\text{train}}^0 = N_{\text{train}} - N_{\text{min max}}$  clusters, where  $N_{\text{train}}$  is the number of compounds in the training set and  $N_{\text{min max}}$  is the number of compounds that have minimum or maximum values of the experimental property. This computes  $N_{\text{train}}^0$  cluster centroid locations as the  $\mathbf{C}_1$  matrix of  $N_{\text{train}}^0 \times (D^* + 1)$  size.
5. The training set is prepared by selecting one compound per cluster which is nearer to the cluster centroid; the training set also includes the  $N_{\text{min max}}$  compounds. In this way, the  $N_{\text{train}}$  compounds are identified.

6. Use  $\mathbf{C}^{\text{stand}}$  together with the Euclidean metrics and  $N_{\text{runs}} = 10,000$  runs in the optimization procedure of k-MCA, in order to achieve the best solution for creating  $N_{\text{val}}$  clusters with the remaining  $N - N_{\text{train}}$  compounds. This computes  $N_{\text{val}}$  cluster centroid locations as the  $\mathbf{C}_2$  matrix of  $N_{\text{val}} \times (D^* + 1)$  size.
7. The validation set is prepared by selecting one compound per cluster which is nearer to the cluster centroid. In this way, the  $N_{\text{val}}$  compounds are identified.
8. Finally, the test set is identified as the remaining  $N_{\text{test}} = N - N_{\text{train}} - N_{\text{val}}$  compounds.
